# Supplementary material for: Technical note: Towards atmospheric compound identification in chemical ionization mass spectrometry with machine learning
Source: Copernicus journal article supplement (doi:10.5194/egusphere-2024-1846), 2024-07-18
Supplement: Supplementary file 1 [file egusphere-2024-1846-supplement.pdf]

# ***Supplement of Technical note: Towards atmospheric compound identification in chemical ionization mass spectrometry with machine learning***

Federica Bortolussi<sup>1</sup>, Hilda Sandström<sup>2</sup>, Fariba Partovi<sup>3,4</sup>, Joonas Mikkilä<sup>4</sup>, Patrick Rinke<sup>2,5</sup>, and Matti Rissanen<sup>1,3</sup>

<sup>1</sup>Department of Chemistry, University of Helsinki, 00560 Helsinki, Finland

<sup>2</sup>Department of Applied Physics, Aalto University, Espoo, Finland

<sup>3</sup>Aerosol Physics Laboratory, Physics Unit, Tampere University, 33720 Tampere, Finland

<sup>4</sup>Karsa Ltd., A. I. Virtasen aukio 1, 00560 Helsinki, Finland

<sup>5</sup>Physics Department, TUM School of Natural Sciences, Technical University of Munich, Garching, Germany

**Correspondence:** Federica Bortolussi (federica.bortolussi@helsinki.fi)

## **Contents**

|                                                                                                                                                          |            |
|----------------------------------------------------------------------------------------------------------------------------------------------------------|------------|
| <b>S1 Description of S.I.</b>                                                                                                                            | <b>S2</b>  |
| <b>S2 Dataset: additional analysis, excluded molecules and tin molecules</b>                                                                             | <b>S4</b>  |
| <b>S3 Molecular descriptors: properties info, MBTR comparison</b>                                                                                        | <b>S11</b> |
| <b>5 S4 Tuned hyperparameters</b>                                                                                                                        | <b>S13</b> |
| <b>S5 Additional results: RF accuracy, recall, precision, f1 score; KRR MSE and R<sup>2</sup>; chemical insight with RDkit-PROP and MACCS descriptor</b> | <b>S25</b> |
| <b>S6 Additional ML models: NB, SVC (classifiers); linear KRR and RF regressor (regression)</b>                                                          | <b>S35</b> |

## S1 Description of S.I.

### 10 Section: S2

The dataset (Partovi et al., 2024) contains the measurements of 716 pesticides at 5 different sample concentrations. Figure S1 presents the number of molecules detected for each sample concentration for the four ionization schemes. Since the dataset size, we decided to focus the analysis in the main text on the highest concentration only ( $2,5 \text{ ng } \mu\text{l}^{-1}$ ), to provide a relatively balanced dataset (in the case of the classification model) and the highest amount of instances (in case of the regression model).

- 15 Figure S2 presents the distribution of logarithmic signal intensities for the five different concentrations for each ionization scheme. Figure S3 presents the molecular weight distribution against the signal intensity. The pesticides giving a signal outside the red box were not considered for the analysis in the main text. Figure S4 presents the molecular weight distribution for both detected and undetected pesticides. Figure S5 presents the normalized distribution of different functional groups (with highlighted the frequency of occurrence), and the overall distribution of the number of functional groups for the dataset. To
- 20 calculate the functional groups we employed the Python library developed by Ruggeri and Takahama (2016).

Tables S1 and S2 present the list of pesticides excluded from the analysis in the main text. Table S3 shows the three molecules containing tin. One of the molecules was excluded from the analysis, having a molecular weight above 600 u.

### Section: S3

- 25 Table S4 presents all the properties present in the RDkitPROP model, with a description. All the properties are calculated with the class `rdkit.Chem.rdMolDescriptors.Properties()` from the library *rdkit* (Landrum, 2006). Figure S6 shows the learning curve of KRR for the four different ionization methods with MBTR as the molecular descriptor. The figure presents MBTR with three terms on the left ( $k_1$  = the atomic numbers,  $k_2$  = the distance and  $k_3$  = the angle) and MBTR with two terms on the right ( $k_2$  = the distance and  $k_3$  = the angle). The results obtained are comparative, so only two terms were used for all the ML
- 30 models to decrease the computational costs.

### Section: S4

Table S5 presents the tuning range list of the hyperparameters for both the ML models and the molecular descriptors (with additional information on the hyperparameter). The tuned hyperparameters for each ML model based on each ionization method

35 data can be found in the following tables for each molecular descriptor and each random re-shuffle of the data. Tables S6, S7, S8, S9, S10 present the hyperparameter tuning for RF classifier. Tables S11, S12, S13, S14, S15 present the hyperparameter tuning for KRR with Gaussian kernel.

### Section: S5

- 40 In the main text, RF presents the accuracy of the prediction in a table form, here Figure S7 presents the learning curve of the accuracy over an increase of training size. The following features present similar performance metrics: recall (Fig. S8), precision (Fig. S9) and f1 score (Fig. S10). In the main text, the learning curve of KRR was based on the mean absolute error

value (MAE), here we will show the learning curve of similar performance metrics: mean squared error (MSE, Fig. S11) and correlation coefficient ( $R^2$ , Fig. S12). Tables S16 and S17 present the complete RDkitPROP RF best estimator feature importances % for  $\text{Br}^-$  and  $\text{O}_2^-$ , and  $\text{H}_3\text{O}^+$  and  $\text{AceH}^+$ . Tables S18 and S19 present the complete MACCS-based RF best estimator feature importances% for  $\text{Br}^-$  and  $\text{O}_2^-$ , and  $\text{H}_3\text{O}^+$  and  $\text{AceH}^+$ .

#### Section: S6

In this work we trained in total 6 ML models: 3 classifiers (RF, naive Bayes (NB) and support vector classifier (SVC)), 3 regressors (KRR with Gaussian kernel, KRR with linear kernel and RF regressor). For each model, we will report the hyperparameters tuning and the learning curves with accuracy, recall, precision and f1 score (classifier), and MAE, MSE and  $R^2$  (regressor).

Table S20 presents the tuning range list of the hyperparameters for the additional ML models (with additional information on the hyperparameter). The tuned hyperparameters for each ML model based on each ionization method data can be found in the following tables for each molecular descriptor and each random re-shuffle of the data.

We run a NB classifier to show the performance of a simple classification model in comparison to the one reported in the main text (Tables S21, S22 and Fig. S13, S14, S15, S16). The NB model presents a poor performance compared to the RF classifier.

We run SVC to show the performance of a similarly complicated classifier model as the one used in the main text (Tables S23, S24, S25, S26, S27 and Fig. S17, S18, S19, S20). The performance appears similar to the results found with KRR with the Gaussian kernel.

We run KRR with a linear kernel to show the performance of a simple regression model in comparison to the one reported in the main text (Tables S28 S29 and Fig. S21, S22, S23). In fact, the linear kernel performs poorly compared to the Gaussian kernel.

We run a RF regressor to show the performance of a similarly complicated regression model as the one used in the main text (Tables S30, S31, S32, S33, S34 and Fig. S24, S25, S26). The performance appears similar to the results found with KRR with the Gaussian kernel.

## S2 Dataset: additional analysis, excluded molecules and tin molecules

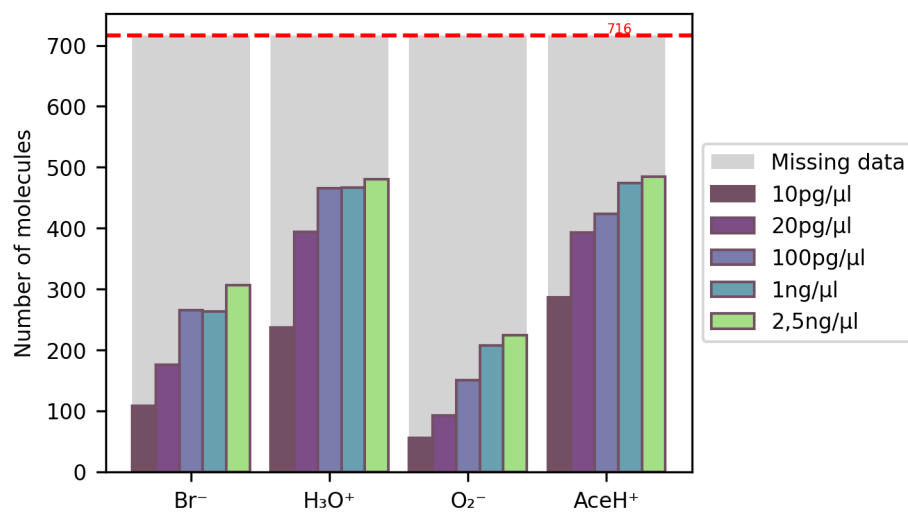

**Figure S1.** Number of detected pesticides for the experiments at five different concentrations and before filtering.

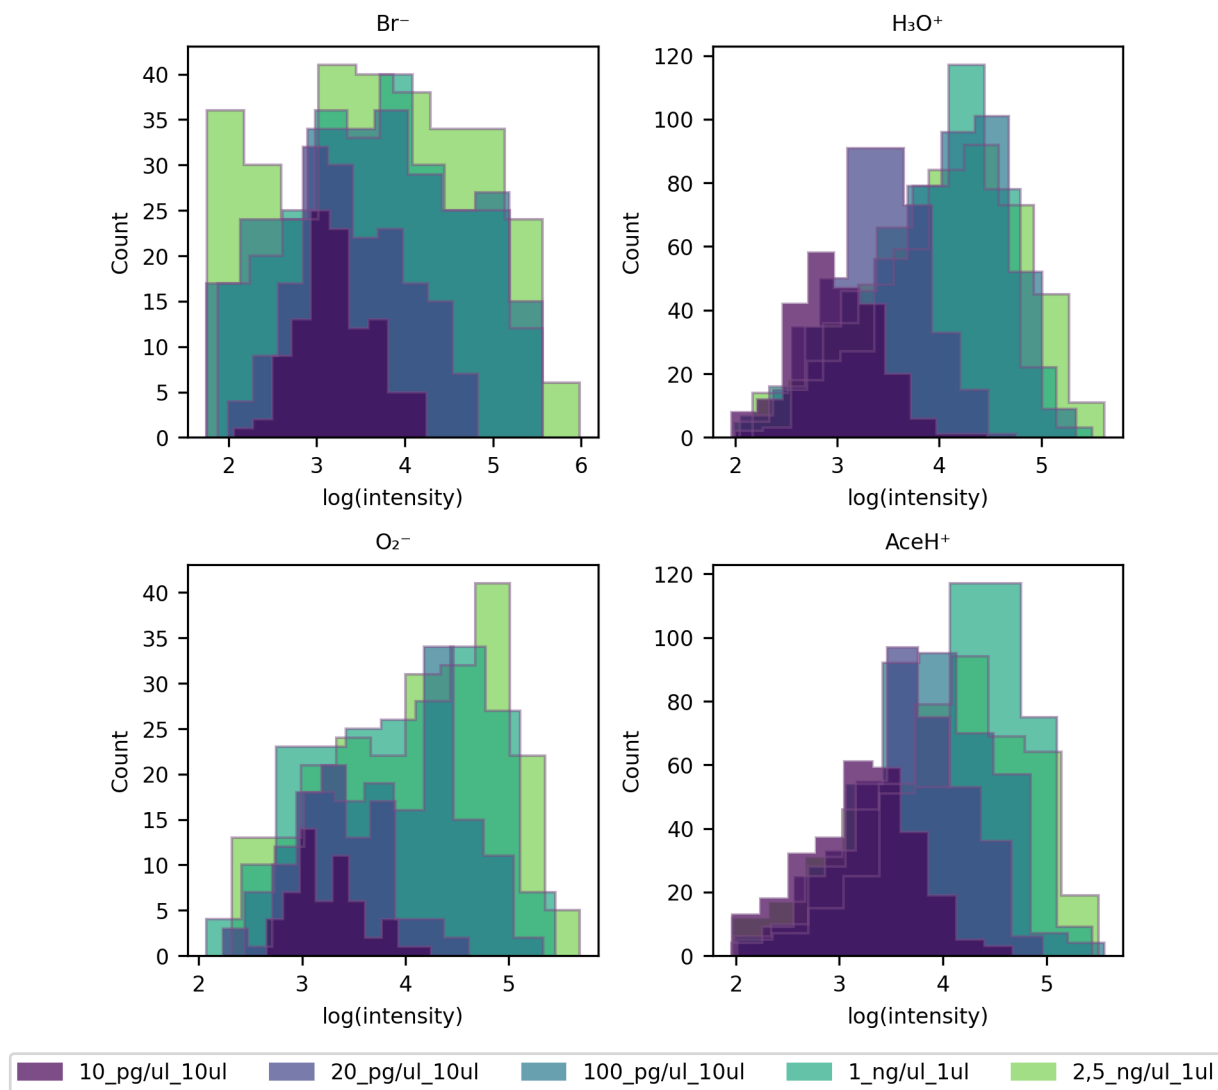

**Figure S2.** Detected molecules signal intensity distribution shown in a logarithmic scale for the four reagent ions studied for five different concentrations

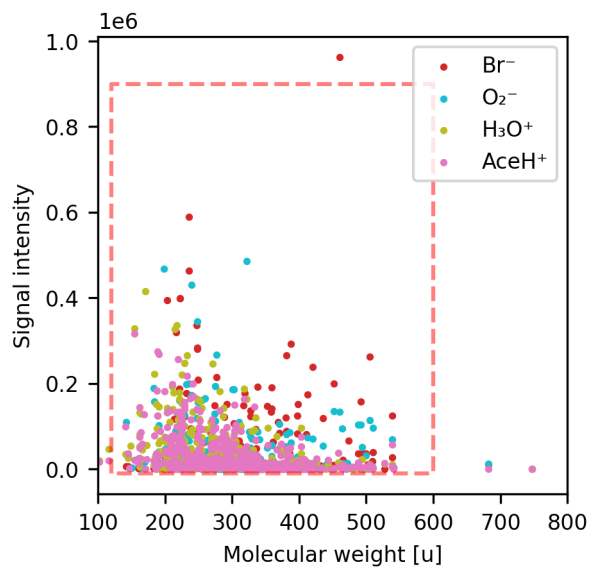

**Figure S3.** Scatter plot of the dataset prior to outlier filtering. The data points outside the red square are excluded from the analysis.

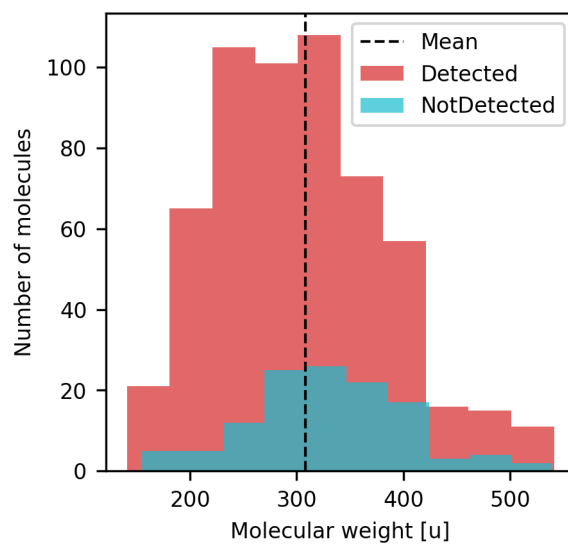

**Figure S4.** Distribution of molecular weight: the detected count is red, while the undetected count is light blue.

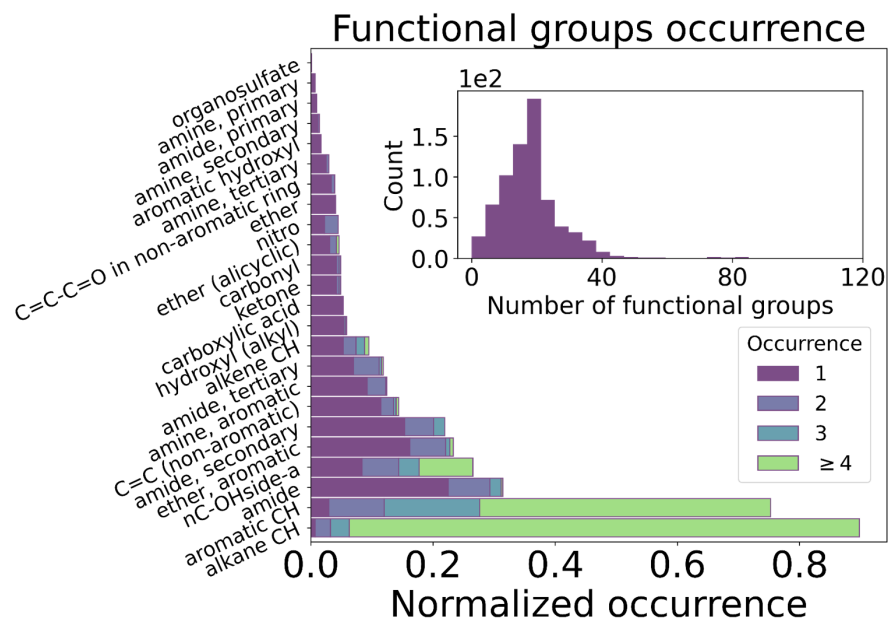

**Figure S5.** Normalized functional groups distribution of the dataset, with the occurrence highlighted and total number of functional groups distribution.

**Table S1.** List of pesticides excluded from the analysis: name, CAS, molecular weight (Mw), signal intensities for the four ionization methods and reason of exclusion. Measurements at a sample concentration of 2,5 ng  $\mu\text{l}^{-1}$ .

| Name                                      | CAS         | Mw [u]  | Br <sup>-</sup><br>[a.u.] | O <sub>2</sub> <sup>-</sup><br>[a.u.] | H <sub>3</sub> O <sup>-</sup><br>[a.u.] | AceH <sup>+</sup><br>[a.u.] | Reason                                 |
|-------------------------------------------|-------------|---------|---------------------------|---------------------------------------|-----------------------------------------|-----------------------------|----------------------------------------|
| 1-Naphthylacetamide (1)                   | 86-86-2     | 185.08  | 0                         | 0                                     | 17700                                   | 6460.0                      | Appears twice                          |
| 1-Naphthylacetamide (2)                   | 86-86-2     | 185.08  | 0                         | 0                                     | 14300                                   | 18500.0                     | Appears twice                          |
| Abamectin B1a                             | 65195-55-3  | 872.49  | 0                         | 0                                     | 0                                       | 0                           | Mw > 600 u                             |
| Acibenzolar acid (1)                      | 35272-27-6  | 180.00  | 0                         | 0                                     | 0                                       | 0                           | Appears twice                          |
| Acibenzolar acid (2)                      | 35272-27-6  | 180.00  | 0                         | 0                                     | 0                                       | 0                           | Appears twice                          |
| Azadirachtin                              | 11141-17-6  | 720.26  | 0                         | 0                                     | 0                                       | 0                           | Mw > 600 u                             |
| Emamectin B1a                             | 155569-91-8 | 885.52  | 0                         | 0                                     | 0                                       | 0                           | Mw > 600 u                             |
| Ethylenethiourea                          | 96-45-7     | 102.03  | 0                         | 0                                     | 19700                                   | 16300.0                     | Mw < 120 u                             |
| Fenbutatin-oxide                          | 13356-08-6  | 1054.41 | 0                         | 0                                     | 0                                       | 0                           | Mw > 600 u                             |
| Fenpicoxamid                              | 517875-34-2 | 614.25  | 0                         | 0                                     | 0                                       | 0                           | Mw > 600 u                             |
| Fenpyrazamine (1)                         | 473798-59-3 | 331.14  | 0                         | 0                                     | 0                                       | 0                           | Appears twice                          |
| Fenpyrazamine (2)                         | 473798-59-3 | 331.14  | 1070.0                    | 2360                                  | 45100                                   | 21800.0                     | Appears twice                          |
| Flubendiamide                             | 272451-65-7 | 682.02  | 10600.0                   | 12500                                 | 0                                       | 189.0                       | Mw > 600 u                             |
| Hexadecyltrimethylammonium<br>chlorid (1) | 112-02-7    | 319.30  | 0                         | 0                                     | 0                                       | 0                           | Appears twice                          |
| Hexadecyltrimethylammonium<br>chlorid (2) | 112-02-7    | 319.30  | 0                         | 0                                     | 0                                       | 0                           | Appears twice                          |
| Hexaflumuron                              | 86479-06-3  | 459.98  | 962000.0                  | 134000                                | 4600                                    | 6440.0                      | Br <sup>-</sup> signal > 900000 [a.u.] |
| Imazapyr (1)                              | 81334-34-1  | 261.11  | 1780.0                    | 13800                                 | 16600                                   | 17600.0                     | Appears twice                          |
| Imazapyr (2)                              | 81334-34-1  | 261.11  | 4310.0                    | 39900                                 | 93000                                   | 8500.0                      | Appears twice                          |
| Propylen Thiourea                         | 2122-19-2   | 116.04  | 0                         | 0                                     | 46000                                   | 19200.0                     | Mw < 120 u                             |
| Pyridafol (1)                             | 40020-01-7  | 206.02  | 0                         | 0                                     | 0                                       | 0                           | Appears twice                          |
| Pyridafol (2)                             | 40020-01-7  | 206.02  | 34900.0                   | 60600                                 | 15600                                   | 12600.0                     | Appears twice                          |
| Spinetoram J                              | 187166-40-1 | 747.49  | 289.0                     | 0                                     | 301                                     | 266.0                       | Mw > 600 u                             |
| Spinosad A                                | 131929-60-7 | 731.46  | 0                         | 0                                     | 0                                       | 0                           | Mw > 600 u                             |

**Table S2.** List of pesticides excluded from the analysis: name and 2D molecular structure

| Name                | Structure                                                                           | Name                               | Structure                                                                             |
|---------------------|-------------------------------------------------------------------------------------|------------------------------------|---------------------------------------------------------------------------------------|
| 1-Naphthylacetamide | 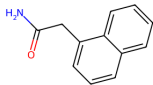   | Flubendiamide                      | 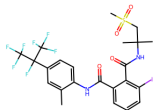   |
| Abamectin B1a       | 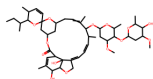   | Hexadecyltrimethylammonium chlorid | 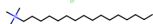   |
| Acibenzolar acid    | 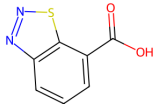   | Hexaflumuron                       | 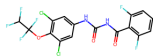   |
| Azadirachtin        | 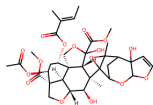   | Imazapyr                           | 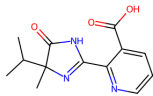   |
| Emamectin B1a       | 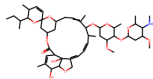  | Propylen Thiourea                  | 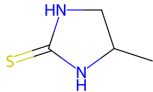  |
| Ethylenethiourea    | 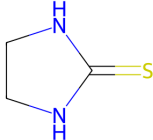 | Pyridafol                          | 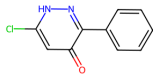 |
| Fenbutatin-oxide    | 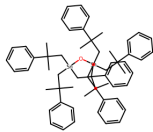 | Spinetoram J                       | 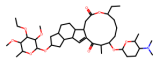 |
| Fenpicoxamid        | 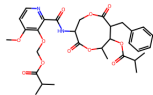 | Spinosyn A                         | 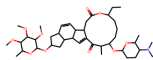 |
| Fenpyrazamine       | 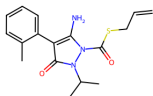 |                                    |                                                                                       |

**Table S3.** Molecules containing tin (Sn).

| Target               | CAS        | Molecular weight [u] | Structure                                                                          | Additional information     |
|----------------------|------------|----------------------|------------------------------------------------------------------------------------|----------------------------|
| Fenbutatin-oxide     | 13356-08-6 | 1054.41              | 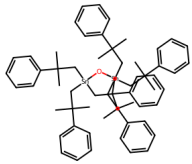 | Excluded from the analysis |
| Cyhexatin            | 13121-70-5 | 387.17               | 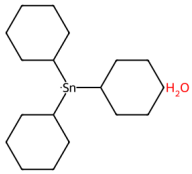 | Included in the analysis   |
| Triphenyltin hydride | 892-20-6   | 351.02               | 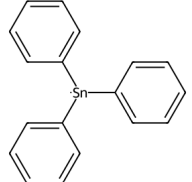 | Included in the analysis   |

### S3 Molecular descriptors: properties info, MBTR comparison

**Table S4.** List of properties calculated with *rdkit* for the RDKitPROP descriptor.

| Property                          | Info                                                                                                                                                                                           |
|-----------------------------------|------------------------------------------------------------------------------------------------------------------------------------------------------------------------------------------------|
| Exactmw                           | Returns the exact molecular weight for a molecule ("Mw" in the main text)                                                                                                                      |
| Amw                               | Returns the average molecular weight for a molecule                                                                                                                                            |
| LipinskiHBA                       | Calculates the standard Lipinski HBA definition (number of Ns and Os)                                                                                                                          |
| LipinskiHBD                       | Calculates the standard Lipinski HBD definition (number of N-H and O-H bonds)                                                                                                                  |
| NumRotatableBonds                 | Number of rotatable Bonds.                                                                                                                                                                     |
| NumHBD                            | Calculates the number of H-bond donors ("n HBD" in the main text).                                                                                                                             |
| NumHBA                            | Calculates the number of H-bond acceptors ("n HBD" in the main text).                                                                                                                          |
| NumHeavyAtoms                     | Number of heavy atoms a molecule.                                                                                                                                                              |
| NumAtoms                          | Returns the number of atoms.                                                                                                                                                                   |
| NumHeteroatoms                    | Returns the number of heteroatoms.                                                                                                                                                             |
| NumAmideBonds                     | Returns the number of amide bonds.                                                                                                                                                             |
| FractionCSP3                      | Returns the fraction of C atoms that are sp <sup>3</sup> hybridized.                                                                                                                           |
| NumRings                          | Returns the number of rings.                                                                                                                                                                   |
| NumAromaticRings                  | Returns the number of aromatic rings for a molecule.                                                                                                                                           |
| NumAliphaticRings                 | Returns the number of aliphatic (containing at least one non-aromatic bond) rings for a molecule.                                                                                              |
| NumSaturatedRings                 | Returns the number of saturated rings for a molecule.                                                                                                                                          |
| NumHeterocycles                   | Returns the number of heterocycles for a molecule.                                                                                                                                             |
| NumAromaticHeterocycles           | Returns the number of aromatic heterocycles for a molecule.                                                                                                                                    |
| NumSaturatedHeterocycles          | Returns the number of saturated heterocycles for a molecule.                                                                                                                                   |
| NumAliphaticHeterocycles          | Returns the number of aliphatic (containing at least one non-aromatic bond) heterocycles for a molecule.                                                                                       |
| NumSpiroAtoms                     | Number of spiro atoms (atoms shared between rings that share exactly one atom).                                                                                                                |
| NumBridgeheadAtoms                | Number of bridgehead atoms (atoms shared between rings that share at least two bonds).                                                                                                         |
| NumAtomStereoCenters              | Calculates the total number of atom stereo centers                                                                                                                                             |
| NumUnspecifiedAtomStereoCenters   | Returns the number of atom stereo centers when the molecule has unspecified stereochemistry.                                                                                                   |
| LabuteASA                         | Calculates Labute's Approximate Surface Area (Labute, 2000).                                                                                                                                   |
| TPSA                              | Returns the topological Polar Surface Area (Ertl et al., 2000).                                                                                                                                |
| CrippenClogP                      | Uses an atom-based scheme based on the values in (Wildman and Crippen, 1999) to calculate the default Wildman-Crippen partition coefficient (LogP) for a molecule (Wildman and Crippen, 1999). |
| CrippenMR                         | Uses an atom-based scheme based on the values in (Wildman and Crippen, 1999) to calculate the default Wildman-Crippen molar refractivity (MR) estimate for a molecule.                         |
| chi0v, chi1v, chi2v, chi3v, chi4v | From equations (5),(9) and (10) of Hall and Kier (1991).                                                                                                                                       |
| chi0n, chi1n, chi2n, chi3n, chi4n | From equations (5),(9) and (10) of Hall and Kier (1991) with nVal instead of valence.                                                                                                          |
| HallKierAlpha                     | Calculate the Hall-Kier alpha value for a molecule from equation (58) of Hall and Kier (1991)                                                                                                  |
| kappa1                            | Calculate the Hall-Kier kappa1 value for a molecule from equations (58) and (59) of Hall and Kier (1991)                                                                                       |
| kappa2                            | Calculate the Hall-Kier kappa2 value for a molecule from equations (58) and (60) of Hall and Kier (1991)                                                                                       |
| kappa3                            | Calculate the Hall-Kier kappa3 value for a molecule from equations (58), (61) and (62) of Hall and Kier (1991)                                                                                 |
| phi                               | Calculate the Kier Phi value for a molecule from Kier (1989)                                                                                                                                   |

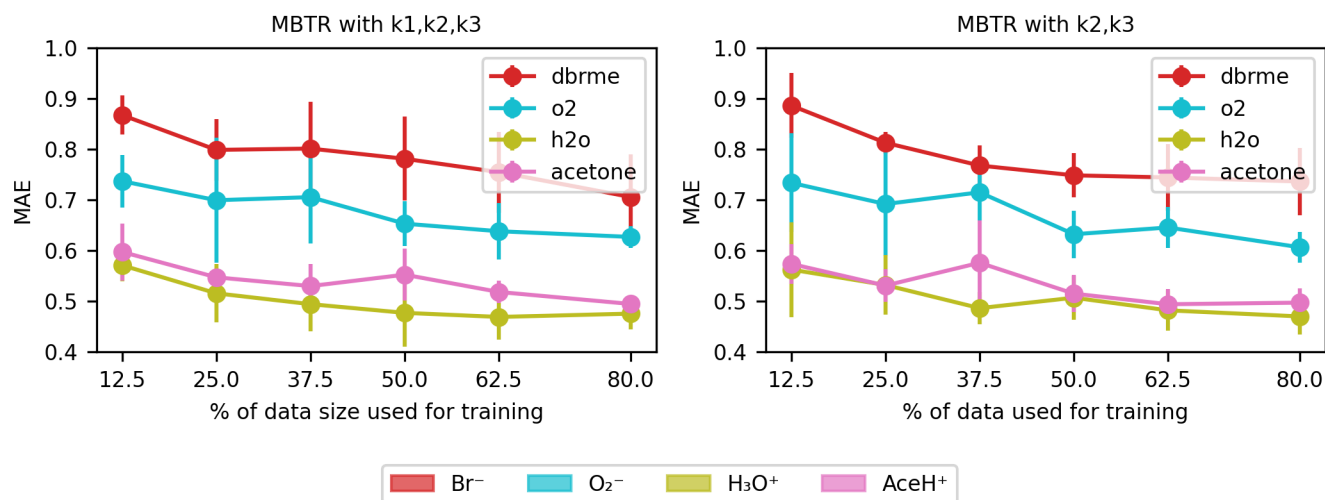

**Figure S6.** Comparison between MBTR results with terms k1,k2,k3 and k2,k3

**Table S5.** Hyperparameters tuning range list for each ML model and each molecular descriptor.

| Model                    | Hyperparameters   | Tuning range                    | Info                                                 |
|--------------------------|-------------------|---------------------------------|------------------------------------------------------|
| RDKitPROP                | None              |                                 |                                                      |
| TopFP                    | Fp size           | [716,2048,4096,8192]            | Final bit length of the fingerprint                  |
|                          | Max path          | [7,8,9,10]                      | Maximum path considered for each bit                 |
|                          | N bits per hash   | [2, 4, 8, 16]                   | Number of bit which are hashed together              |
| MACCS                    | None              |                                 |                                                      |
| CM                       | None              |                                 |                                                      |
| MBTR                     | $\sigma_2$        | [0.3, 0.1, 0.01, 0.001, 0.0001] | Broadening parameter for k=2                         |
|                          | $w_2$             | [0.2, 0.4, 0.8, 1.2, 1.4]       | Weighting parameter for k=2                          |
|                          | $\sigma_3$        | [0.3, 0.1, 0.01, 0.001, 0.0001] | Broadening parameter for k=3                         |
|                          | $w_3$             | [0.2, 0.4, 0.8, 1.2, 1.4]       | Weighting parameter for k=3                          |
| KRR with Gaussian kernel | $\lambda$         | np.logspace(-10, -1, 10)        | Regularization strength                              |
|                          | $\sigma$          | np.logspace(-10, 0, 10)         | Length scale                                         |
| RF classifier            | Max depth         | [20, 40, 60, 80, 100, None]     | The length of each tree, from the root to the leaves |
|                          | Min samples leaf  | [1, 2, 4]                       | Minimum number of samples per leaf                   |
|                          | Min samples split | [2, 5, 10]                      | Minimum number of samples per split                  |
|                          | N estimators      | [100, 500, 1000, 1500, 2000]    | Maximum number of estimators                         |

**Table S6.** Hyperparameters tuned for RF classifier model with PROP as the molecular descriptor.

| Reagent ion                   | Training size | Random seed | Hyperparameters |           |                  |                   |
|-------------------------------|---------------|-------------|-----------------|-----------|------------------|-------------------|
|                               |               |             | RF classifier   |           |                  |                   |
|                               |               |             | N estimators    | Max depth | Min samples leaf | Min samples split |
| Br <sup>-</sup>               | 554           | 555         | 500             | None      | 4                | 5                 |
|                               |               | 8           | 1500            | 40        | 2                | 10                |
|                               |               | 52          | 2000            | 20        | 1                | 5                 |
|                               |               | 1066        | 2000            | 20        | 2                | 2                 |
|                               |               | 324         | 500             | 80        | 2                | 5                 |
| O <sub>2</sub> <sup>-</sup>   | 554           | 555         | 1000            | None      | 1                | 5                 |
|                               |               | 8           | 2000            | None      | 1                | 2                 |
|                               |               | 52          | 1000            | 80        | 1                | 2                 |
|                               |               | 1066        | 2000            | 20        | 1                | 5                 |
|                               |               | 324         | 100             | 60        | 1                | 10                |
| H <sub>3</sub> O <sup>+</sup> | 554           | 555         | 1000            | 100       | 2                | 5                 |
|                               |               | 8           | 2000            | 60        | 1                | 5                 |
|                               |               | 52          | 500             | 60        | 2                | 5                 |
|                               |               | 1066        | 1500            | 40        | 2                | 2                 |
|                               |               | 324         | 2000            | 40        | 1                | 5                 |
| AceH <sup>+</sup>             | 554           | 555         | 1000            | None      | 1                | 5                 |
|                               |               | 8           | 100             | 40        | 4                | 5                 |
|                               |               | 52          | 1500            | 100       | 2                | 5                 |
|                               |               | 1066        | 2000            | 20        | 1                | 5                 |
|                               |               | 324         | 500             | 40        | 2                | 10                |

**Table S7.** Hyperparameters tuned for RF classifier model with TopFP as the molecular descriptor.

| Reagent ion                   | Training size | Random seed | Hyperparameters |          |                 |               |           |                  |                   |
|-------------------------------|---------------|-------------|-----------------|----------|-----------------|---------------|-----------|------------------|-------------------|
|                               |               |             | TopFP           |          |                 | RF classifier |           |                  |                   |
|                               |               |             | Fp size         | Max path | N bits per hash | N estimators  | Max depth | Min samples leaf | Min samples split |
| Br <sup>-</sup>               | 554           | 555         | 2048            | 7        | 4               | 1500          | 40        | 1                | 10                |
|                               |               | 8           | 8192            | 7        | 8               | 2000          | None      | 2                | 2                 |
|                               |               | 52          | 4096            | 7        | 4               | 1000          | 20        | 1                | 5                 |
|                               |               | 1066        | 8192            | 8        | 8               | 2000          | 100       | 2                | 2                 |
|                               |               | 324         | 8192            | 9        | 8               | 1000          | 20        | 1                | 5                 |
| O <sub>2</sub> <sup>-</sup>   | 554           | 555         | 8192            | 8        | 8               | 500           | 20        | 2                | 2                 |
|                               |               | 8           | 4096            | 9        | 2               | 500           | None      | 4                | 10                |
|                               |               | 52          | 2048            | 7        | 2               | 1000          | 40        | 2                | 5                 |
|                               |               | 1066        | 8192            | 9        | 2               | 100           | None      | 4                | 5                 |
|                               |               | 324         | 4096            | 7        | 8               | 1500          | None      | 4                | 10                |
| H <sub>3</sub> O <sup>+</sup> | 554           | 555         | 4096            | 7        | 8               | 100           | 60        | 2                | 2                 |
|                               |               | 8           | 8192            | 7        | 4               | 1000          | None      | 4                | 5                 |
|                               |               | 52          | 4096            | 7        | 4               | 1500          | 100       | 2                | 2                 |
|                               |               | 1066        | 8192            | 8        | 8               | 100           | 80        | 2                | 5                 |
|                               |               | 324         | 8192            | 7        | 4               | 1000          | 100       | 1                | 5                 |
| AceH <sup>+</sup>             | 554           | 555         | 8192            | 7        | 16              | 1500          | 20        | 4                | 5                 |
|                               |               | 8           | 2048            | 8        | 4               | 1500          | 60        | 1                | 2                 |
|                               |               | 52          | 8192            | 9        | 4               | 500           | 80        | 1                | 2                 |
|                               |               | 1066        | 8192            | 7        | 8               | 100           | 40        | 4                | 10                |
|                               |               | 324         | 8192            | 8        | 4               | 100           | 80        | 4                | 10                |

**Table S8.** Hyperparameters tuned for RF classifier model with MACCS as the molecular descriptor.

| Reagent ion                   | Training size | Random seed | Hyperparameters |           |                  |                   |
|-------------------------------|---------------|-------------|-----------------|-----------|------------------|-------------------|
|                               |               |             | RF classifier   |           |                  |                   |
|                               |               |             | N estimators    | Max depth | Min samples leaf | Min samples split |
| Br <sup>-</sup>               | 554           | 555         | 1000            | 100       | 2                | 2                 |
|                               |               | 8           | 100             | 80        | 4                | 10                |
|                               |               | 52          | 100             | 20        | 2                | 5                 |
|                               |               | 1066        | 100             | 40        | 1                | 5                 |
|                               |               | 324         | 100             | None      | 2                | 5                 |
| O <sub>2</sub> <sup>-</sup>   | 554           | 555         | 500             | 100       | 1                | 2                 |
|                               |               | 8           | 1000            | 40        | 2                | 2                 |
|                               |               | 52          | 100             | 80        | 1                | 2                 |
|                               |               | 1066        | 500             | 60        | 1                | 2                 |
|                               |               | 324         | 500             | 40        | 1                | 2                 |
| H <sub>3</sub> O <sup>+</sup> | 554           | 555         | 100             | 20        | 1                | 2                 |
|                               |               | 8           | 1500            | 80        | 1                | 2                 |
|                               |               | 52          | 100             | 100       | 1                | 10                |
|                               |               | 1066        | 500             | 100       | 1                | 10                |
|                               |               | 324         | 500             | 20        | 1                | 5                 |
| AceH <sup>+</sup>             | 554           | 555         | 500             | 40        | 1                | 2                 |
|                               |               | 8           | 100             | 100       | 1                | 2                 |
|                               |               | 52          | 100             | 40        | 1                | 2                 |
|                               |               | 1066        | 100             | 60        | 2                | 2                 |
|                               |               | 324         | 100             | 20        | 2                | 10                |

**Table S9.** Hyperparameters tuned for RF classifier model with CM as the molecular descriptor.

| Reagent ion                   | Training size | Random seed | Hyperparameters |           |                  |                   |
|-------------------------------|---------------|-------------|-----------------|-----------|------------------|-------------------|
|                               |               |             | RF classifier   |           |                  |                   |
|                               |               |             | N estimators    | Max depth | Min samples leaf | Min samples split |
| Br <sup>-</sup>               | 554           | 555         | 100             | 100       | 1                | 2                 |
|                               |               | 8           | 100             | 80        | 2                | 2                 |
|                               |               | 52          | 100             | 80        | 2                | 5                 |
|                               |               | 1066        | 500             | 100       | 1                | 2                 |
|                               |               | 324         | 100             | 100       | 1                | 2                 |
| O <sub>2</sub> <sup>-</sup>   | 554           | 555         | 500             | 60        | 1                | 2                 |
|                               |               | 8           | 500             | 40        | 2                | 5                 |
|                               |               | 52          | 100             | 60        | 2                | 2                 |
|                               |               | 1066        | 100             | 40        | 2                | 10                |
|                               |               | 324         | 500             | 20        | 1                | 2                 |
| H <sub>3</sub> O <sup>+</sup> | 554           | 555         | 500             | 40        | 1                | 2                 |
|                               |               | 8           | 100             | 60        | 2                | 5                 |
|                               |               | 52          | 100             | 100       | 2                | 5                 |
|                               |               | 1066        | 1000            | 60        | 1                | 10                |
|                               |               | 324         | 100             | 40        | 1                | 2                 |
| AceH <sup>+</sup>             | 554           | 555         | 500             | 60        | 1                | 5                 |
|                               |               | 8           | 100             | 100       | 1                | 5                 |
|                               |               | 52          | 500             | 80        | 1                | 2                 |
|                               |               | 1066        | 100             | 20        | 2                | 2                 |
|                               |               | 324         | 100             | 60        | 1                | 2                 |

**Table S10.** Hyperparameters tuned for RF classifier model with MBTR as the molecular descriptor.

| Reagent ion                   | Training size | Random seed | Hyperparameters |       |            |       |               |           |                  |                   |
|-------------------------------|---------------|-------------|-----------------|-------|------------|-------|---------------|-----------|------------------|-------------------|
|                               |               |             | MBTR            |       |            |       | RF classifier |           |                  |                   |
|                               |               |             | $\sigma_2$      | $w_2$ | $\sigma_3$ | $w_3$ | N estimators  | Max depth | Min samples leaf | Min samples split |
| Br <sup>-</sup>               | 554           | 555         | 0.0001          | 0.6   | 0.005      | 1.2   | 1000          | 100       | 1                | 2                 |
|                               |               | 8           | 0.0005          | 0.4   | 0.1        | 1     | 500           | 40        | 1                | 10                |
|                               |               | 52          | 0.01            | 0.4   | 0.005      | 0.6   | 1500          | 60        | 2                | 10                |
|                               |               | 1066        | 0.005           | 1     | 0.1        | 1     | 2000          | 40        | 1                | 10                |
|                               |               | 324         | 0.005           | 0.6   | 0.1        | 0.8   | 2000          | 80        | 1                | 10                |
| O <sub>2</sub> <sup>-</sup>   | 554           | 555         | 0.0001          | 1.2   | 0.1        | 0.8   | 1500          | 20        | 2                | 2                 |
|                               |               | 8           | 0.001           | 0.8   | 0.1        | 1.2   | 100           | None      | 2                | 2                 |
|                               |               | 52          | 0.1             | 0.4   | 0.1        | 1     | 1500          | 60        | 2                | 10                |
|                               |               | 1066        | 0.01            | 0.6   | 0.1        | 1.2   | 2000          | 60        | 1                | 2                 |
|                               |               | 324         | 0.01            | 0.6   | 0.0005     | 0.6   | 1000          | 40        | 1                | 5                 |
| H <sub>3</sub> O <sup>+</sup> | 554           | 555         | 0.1             | 1.2   | 0.005      | 0.6   | 1500          | 40        | 4                | 10                |
|                               |               | 8           | 0.0001          | 0.2   | 0.005      | 0.8   | 500           | 100       | 1                | 5                 |
|                               |               | 52          | 0.001           | 0.6   | 0.1        | 1     | 2000          | None      | 1                | 2                 |
|                               |               | 1066        | 0.001           | 1     | 0.1        | 1     | 1500          | 40        | 2                | 5                 |
|                               |               | 324         | 0.1             | 0.8   | 0.0001     | 0.2   | 500           | 80        | 2                | 2                 |
| AceH <sup>+</sup>             | 554           | 555         | 0.01            | 0.4   | 0.001      | 0.2   | 500           | None      | 1                | 2                 |
|                               |               | 8           | 0.001           | 1.2   | 0.01       | 0.6   | 1500          | 100       | 1                | 10                |
|                               |               | 52          | 0.1             | 1.2   | 0.1        | 1.2   | 2000          | 20        | 1                | 10                |
|                               |               | 1066        | 0.1             | 1     | 0.0005     | 1     | 1000          | 20        | 1                | 2                 |
|                               |               | 324         | 0.01            | 0.8   | 0.0005     | 1     | 1500          | 20        | 1                | 10                |

**Table S11.** Hyperparameters tuned for KRR with Gaussian kernel model with PROP as the molecular descriptor.

| Reagent ion                   | Training size | Random seed | Hyperparameters          |          |
|-------------------------------|---------------|-------------|--------------------------|----------|
|                               |               |             | KRR with Gaussian kernel |          |
|                               |               |             | $\lambda$                | $\sigma$ |
| Br <sup>-</sup>               | 240           | 555         | 1e-10                    | 1.29e-09 |
|                               |               | 8           | 1e-08                    | 1e-10    |
|                               |               | 52          | 1e-07                    | 1.67e-08 |
|                               |               | 1066        | 0.001                    | 2.78e-06 |
|                               |               | 324         | 1e-08                    | 1.67e-08 |
| O <sub>2</sub> <sup>-</sup>   | 174           | 555         | 1e-07                    | 1.29e-09 |
|                               |               | 8           | 1e-08                    | 1.67e-08 |
|                               |               | 52          | 0.001                    | 2.15e-07 |
|                               |               | 1066        | 0.001                    | 2.78e-06 |
|                               |               | 324         | 0.001                    | 1.29e-09 |
| H <sub>3</sub> O <sup>+</sup> | 376           | 555         | 0.0001                   | 2.15e-07 |
|                               |               | 8           | 1e-05                    | 1.67e-08 |
|                               |               | 52          | 1e-05                    | 2.78e-06 |
|                               |               | 1066        | 1e-08                    | 1.29e-09 |
|                               |               | 324         | 1e-06                    | 2.15e-07 |
| AceH <sup>+</sup>             | 379           | 555         | 1e-08                    | 1e-10    |
|                               |               | 8           | 0.0001                   | 2.15e-07 |
|                               |               | 52          | 0.0001                   | 2.15e-07 |
|                               |               | 1066        | 1e-07                    | 1.29e-09 |
|                               |               | 324         | 1e-07                    | 1.67e-08 |

**Table S12.** Hyperparameters tuned for KRR with Gaussian kernel model with TopFP as the molecular descriptor.

| Reagent ion                   | Training size | Random seed | Hyperparameters |          |                 |                          |          |
|-------------------------------|---------------|-------------|-----------------|----------|-----------------|--------------------------|----------|
|                               |               |             | TopFP           |          |                 | KRR with Gaussian kernel |          |
|                               |               |             | Fp size         | Max path | N bits per hash | $\lambda$                | $\sigma$ |
| Br <sup>-</sup>               | 240           | 555         | 4096            | 7        | 4               | 1e-08                    | 1.29e-09 |
|                               |               | 8           | 2048            | 7        | 16              | 0.0001                   | 1.67e-08 |
|                               |               | 52          | 8192            | 8        | 4               | 0.0001                   | 2.78e-06 |
|                               |               | 1066        | 8192            | 8        | 4               | 1e-05                    | 2.78e-06 |
|                               |               | 324         | 8192            | 9        | 4               | 1e-06                    | 1.67e-08 |
| O <sub>2</sub> <sup>-</sup>   | 174           | 555         | 4096            | 7        | 8               | 1e-05                    | 2.78e-06 |
|                               |               | 8           | 8192            | 8        | 2               | 0.01                     | 3.59e-05 |
|                               |               | 52          | 8192            | 7        | 8               | 1e-05                    | 0.000464 |
|                               |               | 1066        | 8192            | 7        | 16              | 1e-07                    | 1e-10    |
|                               |               | 324         | 8192            | 7        | 2               | 1e-06                    | 1.29e-09 |
| H <sub>3</sub> O <sup>+</sup> | 376           | 555         | 8192            | 7        | 16              | 1e-07                    | 2.78e-06 |
|                               |               | 8           | 4096            | 7        | 2               | 1e-06                    | 3.59e-05 |
|                               |               | 52          | 8192            | 9        | 4               | 1e-05                    | 3.59e-05 |
|                               |               | 1066        | 8192            | 8        | 16              | 1e-09                    | 1.29e-09 |
|                               |               | 324         | 8192            | 7        | 8               | 1e-06                    | 0.000464 |
| AceH <sup>+</sup>             | 379           | 555         | 4096            | 7        | 8               | 1e-05                    | 3.59e-05 |
|                               |               | 8           | 4096            | 8        | 8               | 1e-08                    | 3.59e-05 |
|                               |               | 52          | 716             | 9        | 8               | 0.01                     | 3.59e-05 |
|                               |               | 1066        | 8192            | 10       | 4               | 0.001                    | 0.000464 |
|                               |               | 324         | 8192            | 7        | 4               | 0.001                    | 2.15e-07 |

**Table S13.** Hyperparameters tuned for KRR with Gaussian kernel model with MACCS as the molecular descriptor.

| Reagent ion                   | Training size | Random seed | Hyperparameters          |          |
|-------------------------------|---------------|-------------|--------------------------|----------|
|                               |               |             | KRR with Gaussian kernel |          |
|                               |               |             | $\lambda$                | $\sigma$ |
| Br <sup>-</sup>               | 240           | 555         | 0.01                     | 0.00599  |
|                               |               | 8           | 0.1                      | 0.00599  |
|                               |               | 52          | 0.01                     | 0.00599  |
|                               |               | 1066        | 0.1                      | 0.00599  |
|                               |               | 324         | 0.01                     | 0.00599  |
| O <sub>2</sub> <sup>-</sup>   | 174           | 555         | 0.1                      | 0.00599  |
|                               |               | 8           | 0.1                      | 0.00599  |
|                               |               | 52          | 0.1                      | 0.00599  |
|                               |               | 1066        | 0.1                      | 0.00599  |
|                               |               | 324         | 0.1                      | 0.00599  |
| H <sub>3</sub> O <sup>+</sup> | 376           | 555         | 0.1                      | 0.00599  |
|                               |               | 8           | 0.1                      | 0.00599  |
|                               |               | 52          | 1e-07                    | 1.29e-09 |
|                               |               | 1066        | 0.1                      | 0.00599  |
|                               |               | 324         | 0.1                      | 0.00599  |
| AceH <sup>+</sup>             | 379           | 555         | 1e-07                    | 1.29e-09 |
|                               |               | 8           | 0.1                      | 0.00599  |
|                               |               | 52          | 0.1                      | 0.00599  |
|                               |               | 1066        | 0.1                      | 0.00599  |
|                               |               | 324         | 0.1                      | 0.00599  |

**Table S14.** Hyperparameters tuned for KRR with Gaussian kernel model with CM as the molecular descriptor.

| Reagent ion                   | Training size | Random seed | Hyperparameters          |          |
|-------------------------------|---------------|-------------|--------------------------|----------|
|                               |               |             | KRR with Gaussian kernel |          |
|                               |               |             | $\lambda$                | $\sigma$ |
| Br <sup>-</sup>               | 240           | 555         | 0.01                     | 2.15e-07 |
|                               |               | 8           | 0.001                    | 1.67e-08 |
|                               |               | 52          | 1e-05                    | 1e-10    |
|                               |               | 1066        | 0.01                     | 2.15e-07 |
|                               |               | 324         | 0.01                     | 2.15e-07 |
| O <sub>2</sub> <sup>-</sup>   | 174           | 555         | 0.0001                   | 1e-10    |
|                               |               | 8           | 0.01                     | 1.67e-08 |
|                               |               | 52          | 0.01                     | 2.15e-07 |
|                               |               | 1066        | 0.0001                   | 1.29e-09 |
|                               |               | 324         | 0.01                     | 1.67e-08 |
| H <sub>3</sub> O <sup>+</sup> | 376           | 555         | 1e-05                    | 1e-10    |
|                               |               | 8           | 0.0001                   | 1.29e-09 |
|                               |               | 52          | 1e-05                    | 1e-10    |
|                               |               | 1066        | 1e-05                    | 1e-10    |
|                               |               | 324         | 0.1                      | 2.15e-07 |
| AceH <sup>+</sup>             | 379           | 555         | 0.01                     | 1.67e-08 |
|                               |               | 8           | 0.001                    | 1.29e-09 |
|                               |               | 52          | 1e-05                    | 1e-10    |
|                               |               | 1066        | 0.0001                   | 1e-10    |
|                               |               | 324         | 1e-05                    | 1e-10    |

**Table S15.** Hyperparameters tuned for KRR with Gaussian kernel model with MBTR as the molecular descriptor.

| Reagent ion                   | Training size | Random seed | Hyperparameters |       |            |       |                          |          |
|-------------------------------|---------------|-------------|-----------------|-------|------------|-------|--------------------------|----------|
|                               |               |             | MBTR            |       |            |       | KRR with Gaussian kernel |          |
|                               |               |             | $\sigma_2$      | $w_2$ | $\sigma_3$ | $w_3$ | $\lambda$                | $\sigma$ |
| Br <sup>-</sup>               | 240           | 555         | 0.0001          | 1     | 0.01       | 0.2   | 1e-07                    | 2.15e-07 |
|                               |               | 8           | 0.005           | 0.2   | 0.1        | 0.4   | 1e-09                    | 1        |
|                               |               | 52          | 0.01            | 0.2   | 0.005      | 0.8   | 0.1                      | 1        |
|                               |               | 1066        | 0.1             | 1     | 0.01       | 0.2   | 1e-06                    | 2.78e-06 |
|                               |               | 324         | 0.01            | 0.4   | 0.0005     | 1.2   | 1e-08                    | 1.29e-09 |
| O <sub>2</sub> <sup>-</sup>   | 174           | 555         | 0.1             | 0.8   | 0.01       | 0.2   | 1e-09                    | 1.67e-08 |
|                               |               | 8           | 0.01            | 1     | 0.0005     | 0.6   | 0.01                     | 0.0774   |
|                               |               | 52          | 0.01            | 0.4   | 0.001      | 1     | 0.1                      | 0.0774   |
|                               |               | 1066        | 0.001           | 0.8   | 0.1        | 1.2   | 0.0001                   | 0.000464 |
|                               |               | 324         | 0.01            | 0.2   | 0.1        | 1     | 1e-07                    | 2.15e-07 |
| H <sub>3</sub> O <sup>+</sup> | 376           | 555         | 0.1             | 0.4   | 0.1        | 1.2   | 1e-07                    | 2.78e-06 |
|                               |               | 8           | 0.0001          | 1     | 0.0005     | 0.8   | 1e-07                    | 2.15e-07 |
|                               |               | 52          | 0.005           | 0.4   | 0.0005     | 0.2   | 1e-05                    | 2.78e-06 |
|                               |               | 1066        | 0.1             | 1     | 0.1        | 0.8   | 1e-10                    | 1.29e-09 |
|                               |               | 324         | 0.01            | 0.2   | 0.005      | 0.4   | 0.0001                   | 3.59e-05 |
| AceH <sup>+</sup>             | 379           | 555         | 0.0005          | 0.8   | 0.005      | 0.8   | 0.001                    | 0.000464 |
|                               |               | 8           | 0.01            | 0.8   | 0.01       | 0.6   | 1e-07                    | 2.15e-07 |
|                               |               | 52          | 0.005           | 0.6   | 0.005      | 0.2   | 1e-08                    | 2.15e-07 |
|                               |               | 1066        | 0.0001          | 0.6   | 0.001      | 0.2   | 0.001                    | 0.000464 |
|                               |               | 324         | 0.1             | 0.2   | 0.1        | 0.4   | 0.001                    | 0.00599  |



**S5 Additional results: RF accuracy, recall, precision, f1 score; KRR MSE and  $R^2$ ; chemical insight with RDkitPROP and MACCS descriptor**

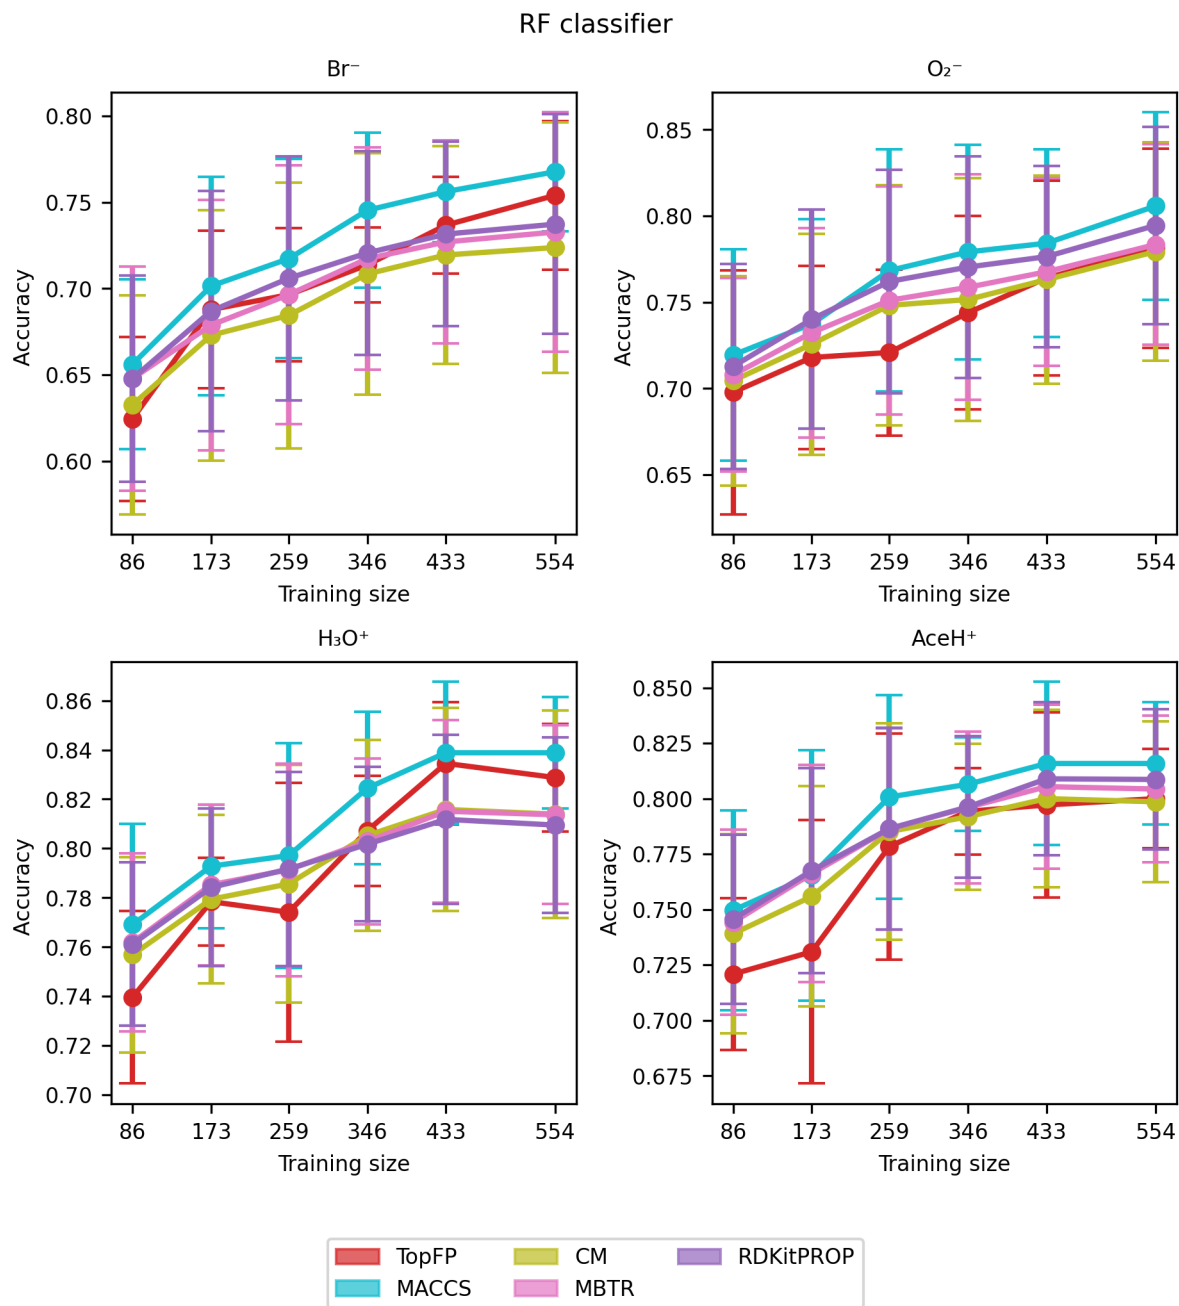

**Figure S7.** Learning curve of the RF with the accuracy of the classification of Br<sup>-</sup>, O<sub>2</sub><sup>-</sup>, H<sub>3</sub>O<sup>+</sup> and AceH<sup>+</sup> datasets, based on the TopFP, MACCS, CM, MBTR and properties as the descriptors. The x-axis reports the training set size, the y-axis reports the classification accuracy. We selected the largest training size (80% of the dataset) and obtained the mean value and standard deviation by repeating the training with five different random re-shuffling of the dataset.

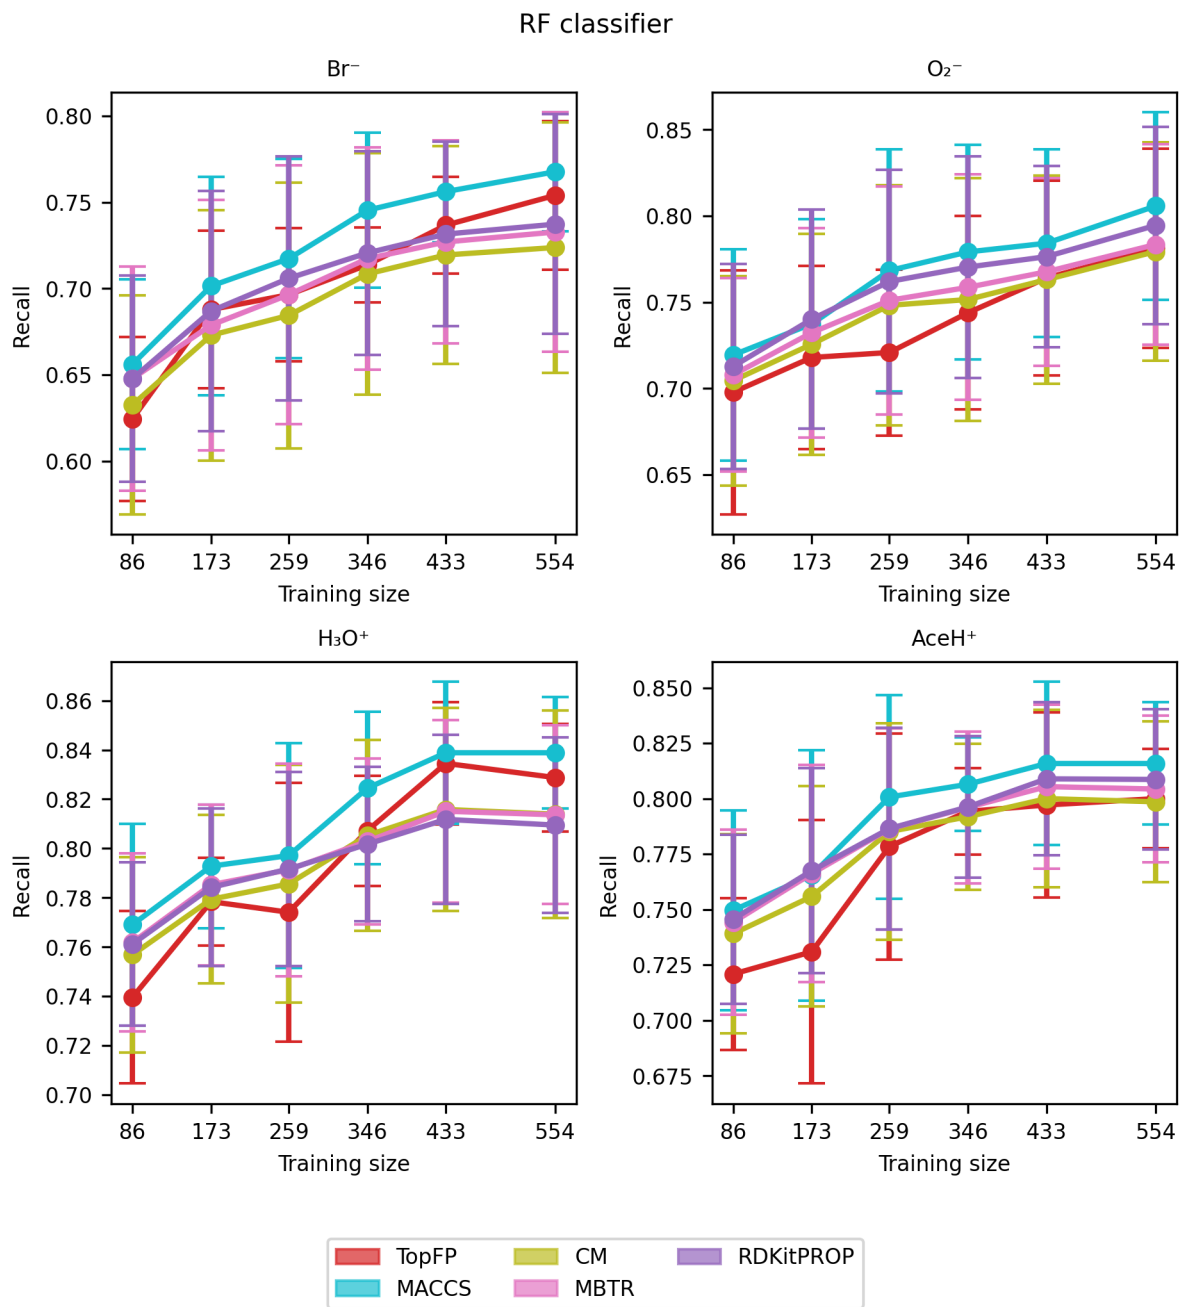

**Figure S8.** Learning curve of the ML with the recall of the classification of  $\text{Br}^-$ ,  $\text{O}_2^-$ ,  $\text{H}_3\text{O}^+$  and  $\text{AceH}^+$  datasets, based on the TopFP, MACCS, CM, MBTR and properties as the descriptors. The x-axis reports the training set size, the y-axis reports the classification recall. The mean value and standard deviation are obtained by repeating the training with five different random re-shuffling of the dataset.

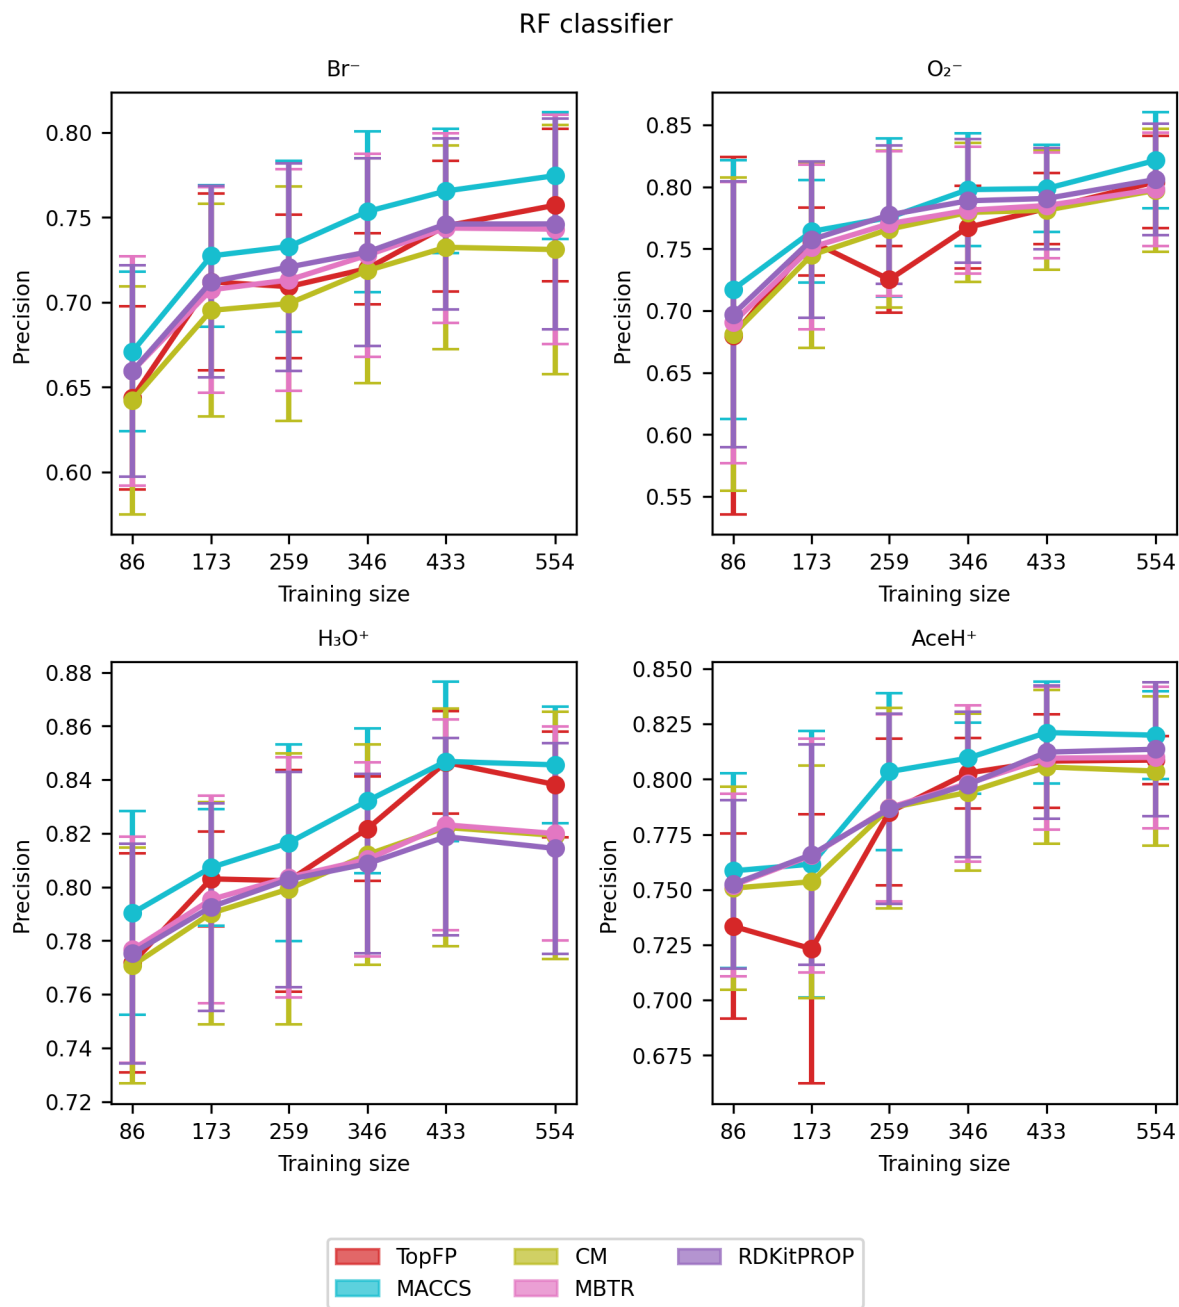

**Figure S9.** Learning curve of the ML with the precision of the classification of  $\text{Br}^-$ ,  $\text{O}_2^-$ ,  $\text{H}_3\text{O}^+$  and  $\text{AceH}^+$  datasets, based on the TopFP, MACCS, CM, MBTR and properties as the descriptors. The x-axis reports the training set size, the y-axis reports the classification precision. The mean value and standard deviation are obtained by repeating the training with five different random re-shuffling of the dataset.

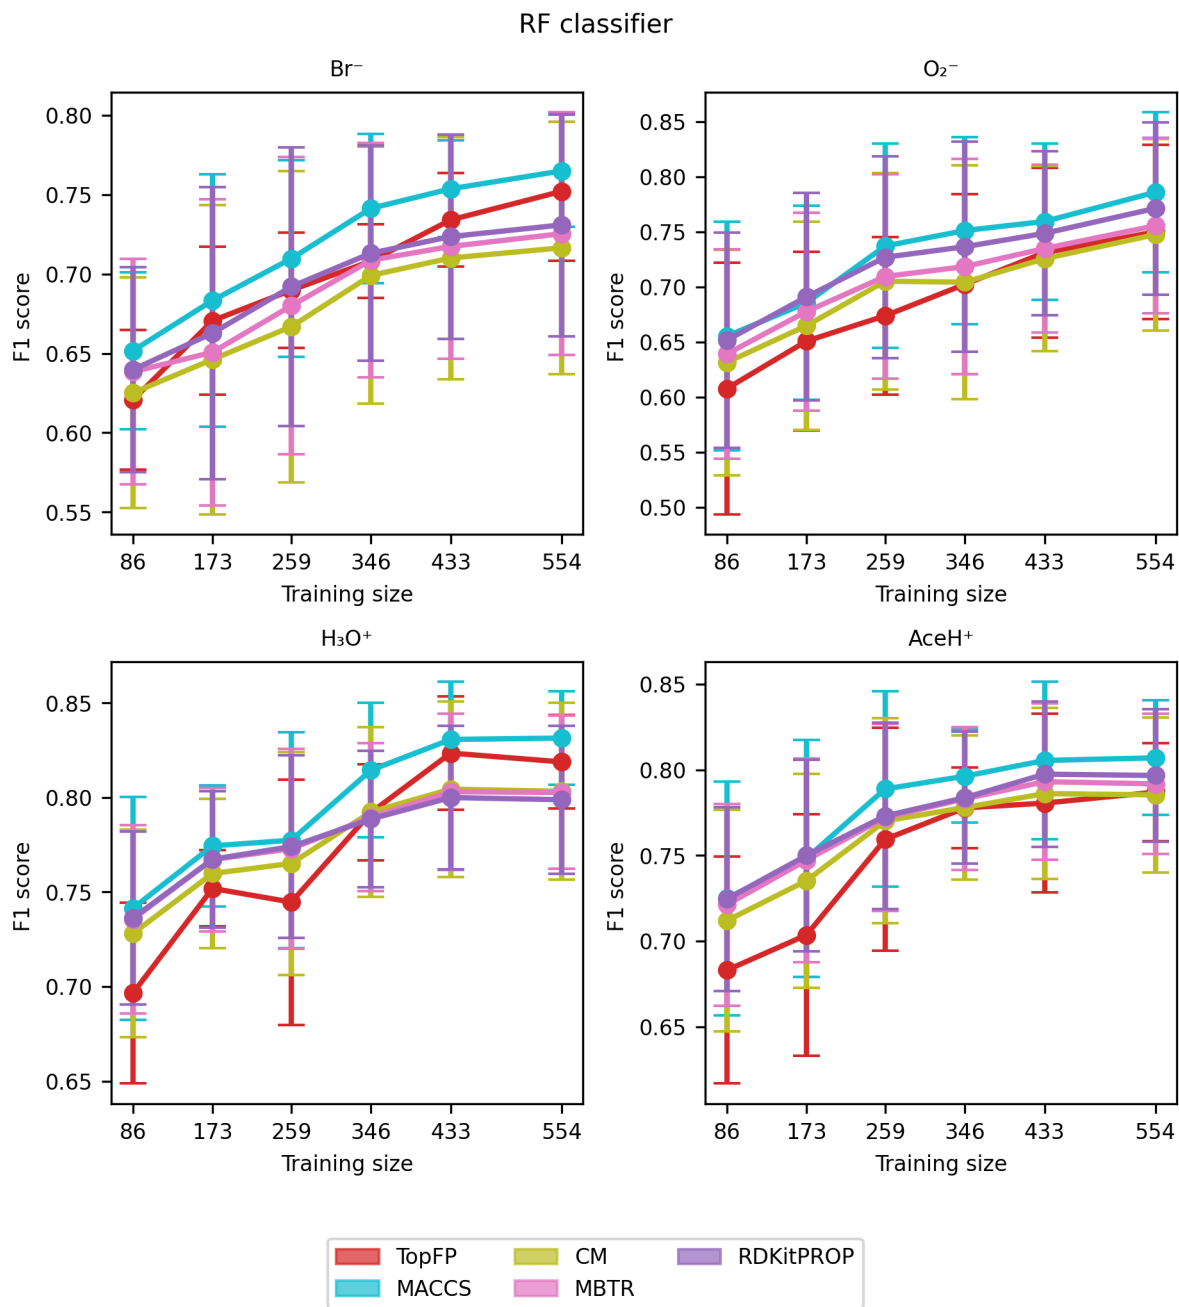

**Figure S10.** Learning curve of the ML with the F1 score of the classification of  $\text{Br}^-$ ,  $\text{O}_2^-$ ,  $\text{H}_3\text{O}^+$  and  $\text{AceH}^+$  datasets, based on the TopFP, MACCS, CM, MBTR and properties as the descriptors. The x-axis reports the training set size, the y-axis reports the classification F1 score. The mean value and standard deviation are obtained by repeating the training with five different random re-shuffling of the dataset.

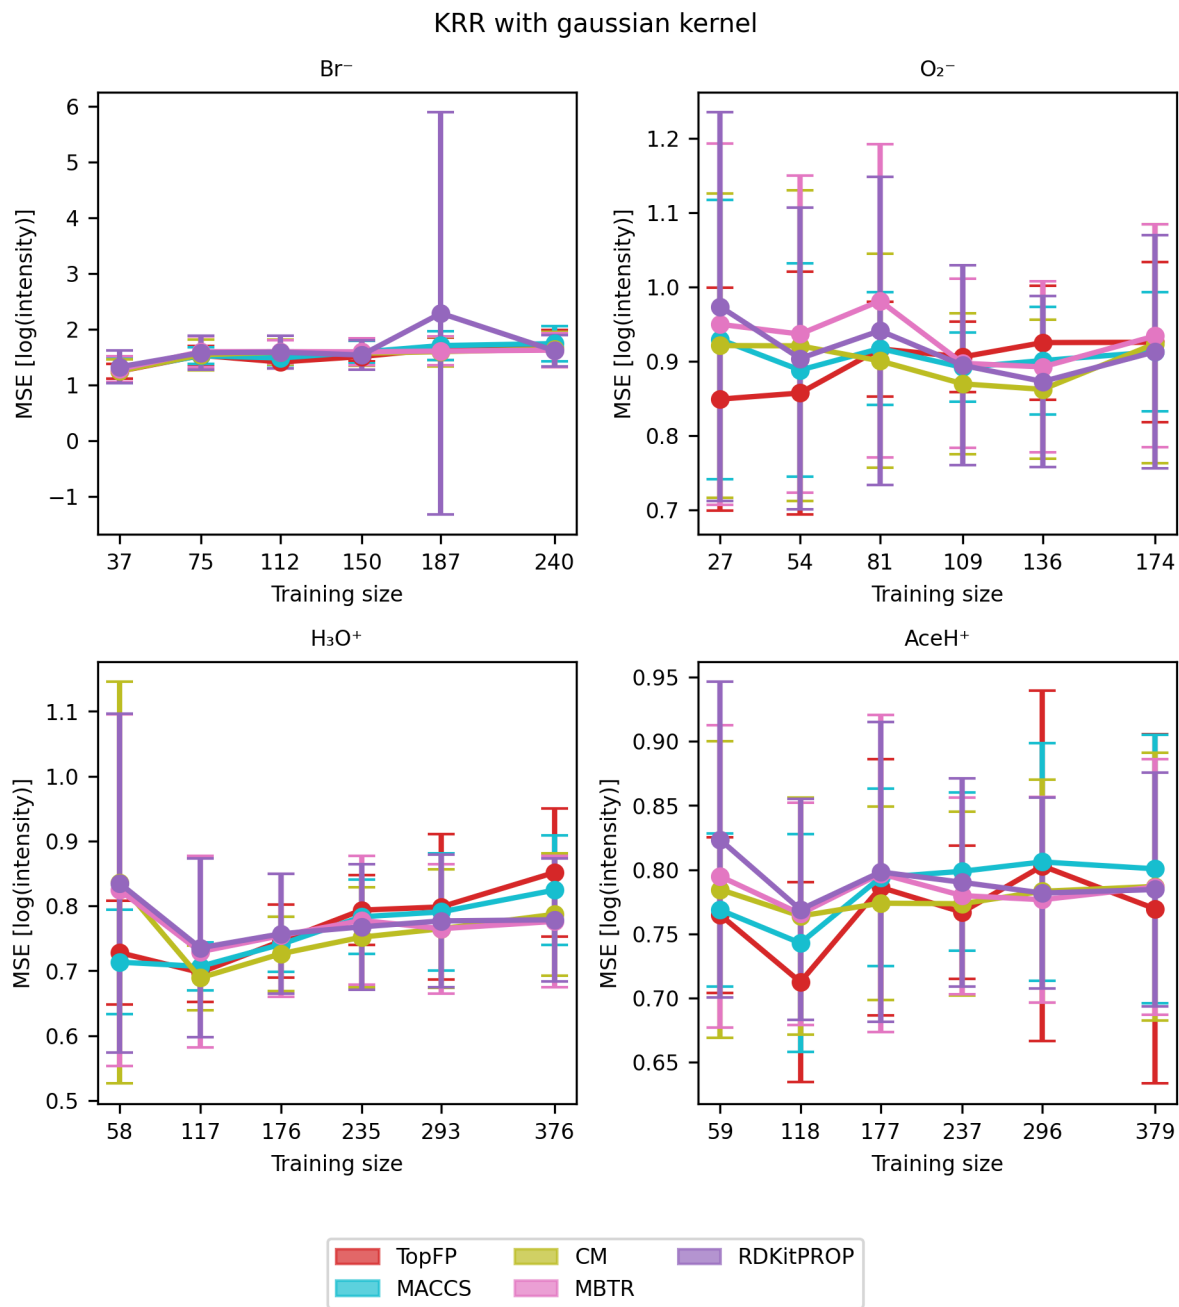

**Figure S11.** Learning curve with mean squared error (MSE) of the signal intensity values in logarithmic scale of  $\text{Br}^-$ ,  $\text{O}_2^-$ ,  $\text{H}_3\text{O}^+$  and  $\text{AceH}^+$  datasets, based on the TopFP, MACCS, CM, MBTR and properties as the descriptors. The x-axis reports the training set size, the y-axis reports the MSE of the logarithmic signal intensity. The mean value and standard deviation are obtained by repeating the training with five different random re-shuffling of the dataset.

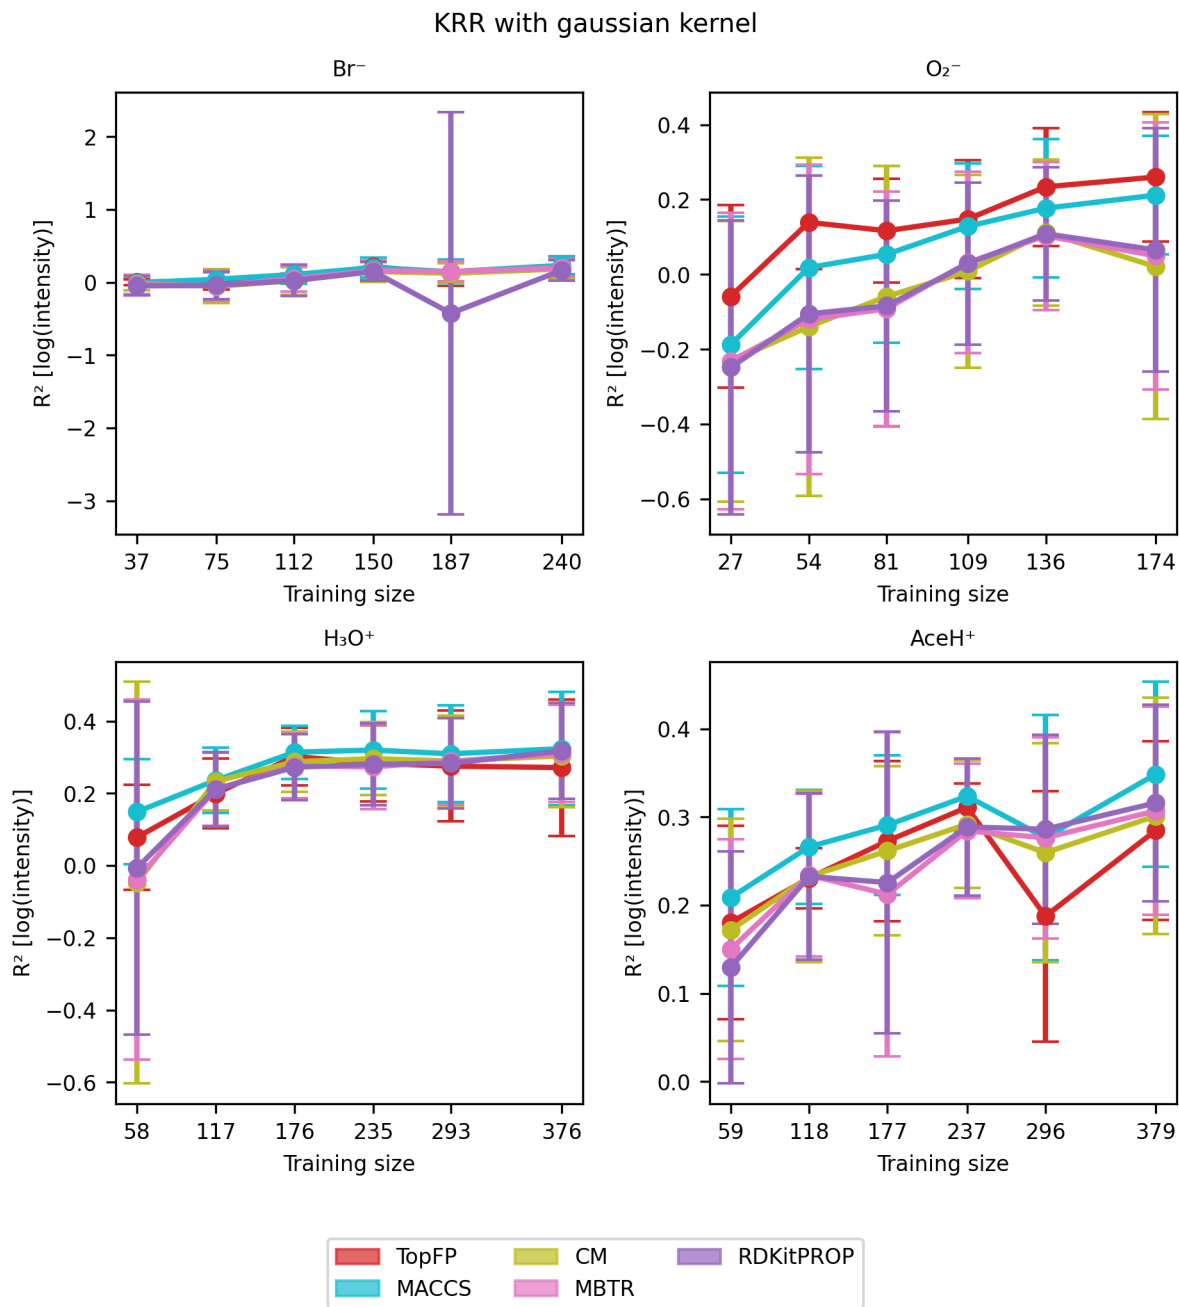

**Figure S12.** Learning curve with correlation coefficient ( $R^2$ ) of the signal intensity values in logarithmic scale of  $\text{Br}^-$ ,  $\text{O}_2^-$ ,  $\text{H}_3\text{O}^+$  and  $\text{AceH}^+$  datasets, based on the TopFP, MACCS, CM, MBTR and properties as the descriptors. The x-axis reports the training set size, the y-axis reports the  $R^2$  of the logarithmic signal intensity. The mean value and standard deviation are obtained by repeating the training with five different random re-shuffling of the dataset.

**Table S16.** RDKitPROP RF best estimator feature importances % for Br<sup>-</sup> and O<sub>2</sub><sup>-</sup>. For each property, the importance value (IMP %) and the average value (avg) for detected molecules (D) and undetected molecules (ND) are reported.

| Property                        | Reagent ions    |                         |                          |                             |                         |                          |
|---------------------------------|-----------------|-------------------------|--------------------------|-----------------------------|-------------------------|--------------------------|
|                                 | Br <sup>-</sup> |                         |                          | O <sub>2</sub> <sup>-</sup> |                         |                          |
|                                 | IMP (%)         | <i>D</i> <sub>avg</sub> | <i>ND</i> <sub>avg</sub> | IMP (%)                     | <i>D</i> <sub>avg</sub> | <i>ND</i> <sub>avg</sub> |
| TPSA                            | 3.44            | 69.62                   | 63.68                    | 3.08                        | 69.11                   | 64.93                    |
| NumHBD (n HBD)                  | 6.55            | 0.86                    | 0.44                     | 10.0                        | 1.06                    | 0.42                     |
| NumHBA (n HBA)                  | 1.58            | 3.94                    | 3.78                     | 1.68                        | 3.68                    | 3.92                     |
| CrippenClogP                    | 3.12            | 3.24                    | 3.39                     | 3.65                        | 3.08                    | 3.44                     |
| FractionCSP3                    | 3.06            | 0.37                    | 0.43                     | 3.73                        | 0.33                    | 0.44                     |
| Exact Mw (Mw)                   | 3.66            | 319.99                  | 299.6                    | 3.04                        | 307.2                   | 308.99                   |
| amw                             | 3.53            | 320.72                  | 300.33                   | 3.16                        | 307.87                  | 309.75                   |
| lipinskiHBA                     | 2.15            | 4.58                    | 3.96                     | 1.45                        | 4.57                    | 4.07                     |
| lipinskiHBD                     | 6.41            | 0.91                    | 0.49                     | 9.25                        | 1.12                    | 0.46                     |
| NumRotatableBonds               | 1.85            | 4.04                    | 4.61                     | 1.16                        | 3.78                    | 4.63                     |
| NumHeavyAtoms                   | 2.0             | 20.57                   | 18.86                    | 1.78                        | 19.94                   | 19.44                    |
| NumAtoms                        | 2.44            | 35.2                    | 34.83                    | 2.39                        | 33.74                   | 35.56                    |
| NumHeteroatoms                  | 3.32            | 7.05                    | 6.01                     | 2.17                        | 6.92                    | 6.25                     |
| NumAmideBonds                   | 1.02            | 0.67                    | 0.4                      | 1.32                        | 0.75                    | 0.41                     |
| NumRings                        | 0.77            | 1.82                    | 1.61                     | 0.47                        | 1.72                    | 1.69                     |
| NumAromaticRings                | 0.9             | 1.46                    | 1.19                     | 0.52                        | 1.45                    | 1.24                     |
| NumAliphaticRings               | 0.32            | 0.36                    | 0.42                     | 0.45                        | 0.27                    | 0.45                     |
| NumSaturatedRings               | 0.28            | 0.23                    | 0.28                     | 0.23                        | 0.17                    | 0.3                      |
| NumHeterocycles                 | 0.79            | 0.63                    | 0.49                     | 0.43                        | 0.59                    | 0.53                     |
| NumAromaticHeterocycles         | 1.01            | 0.48                    | 0.3                      | 0.51                        | 0.49                    | 0.32                     |
| NumSaturatedHeterocycles        | 0.1             | 0.08                    | 0.11                     | 0.09                        | 0.05                    | 0.12                     |
| NumAliphaticHeterocycles        | 0.23            | 0.15                    | 0.19                     | 0.28                        | 0.1                     | 0.21                     |
| NumSpiroAtoms                   | 0.06            | 0.02                    | 0.01                     | 0.05                        | 0.01                    | 0.01                     |
| NumBridgeheadAtoms              | 0.01            | 0.05                    | 0.09                     | 0.02                        | 0.02                    | 0.1                      |
| NumAtomStereoCenters            | 0.53            | 0.61                    | 0.56                     | 0.53                        | 0.45                    | 0.64                     |
| NumUnspecifiedAtomStereoCenters | 0.71            | 0.52                    | 0.44                     | 0.48                        | 0.41                    | 0.5                      |
| labuteASA                       | 3.08            | 126.05                  | 118.74                   | 2.65                        | 120.96                  | 122.34                   |
| CrippenMR                       | 2.46            | 78.11                   | 75.71                    | 2.91                        | 74.75                   | 77.67                    |
| chi0v                           | 2.61            | 12.67                   | 12.36                    | 2.83                        | 12.05                   | 12.7                     |
| chi1v                           | 2.83            | 7.36                    | 7.36                     | 2.99                        | 6.92                    | 7.56                     |
| chi2v                           | 3.43            | 4.13                    | 4.32                     | 3.28                        | 3.75                    | 4.47                     |
| chi3v                           | 3.29            | 4.13                    | 4.32                     | 3.3                         | 3.75                    | 4.47                     |
| chi4v                           | 2.92            | 2.8                     | 3.01                     | 3.12                        | 2.45                    | 3.14                     |
| chi0n                           | 3.29            | 11.36                   | 10.88                    | 2.78                        | 10.94                   | 11.15                    |
| chi1n                           | 2.98            | 6.18                    | 5.93                     | 2.71                        | 5.93                    | 6.09                     |
| chi2n                           | 2.48            | 2.91                    | 2.75                     | 2.24                        | 2.77                    | 2.85                     |
| chi3n                           | 2.49            | 2.91                    | 2.75                     | 2.32                        | 2.77                    | 2.85                     |
| chi4n                           | 3.1             | 1.88                    | 1.82                     | 2.52                        | 1.76                    | 1.88                     |
| hallKierAlpha                   | 4.11            | -1.58                   | -1.11                    | 3.94                        | -1.69                   | -1.14                    |
| kappa1                          | 3.14            | 15.75                   | 14.96                    | 2.67                        | 15.17                   | 15.36                    |
| kappa2                          | 2.62            | 6.48                    | 6.54                     | 2.57                        | 6.17                    | 6.67                     |
| kappa3                          | 2.66            | 3.94                    | 4.13                     | 2.55                        | 3.75                    | 4.19                     |
| Phi                             | 2.68            | 5.06                    | 5.36                     | 2.69                        | 4.78                    | 5.43                     |

**Table S17.** RDKitPROP RF best estimator feature importances % for H<sub>3</sub>O<sup>+</sup> and AceH<sup>+</sup>. For each property, the importance value (IMP %) and the average value (avg) for detected molecules (D) and undetected molecules (ND) are reported.

| Property                        | Reagent ions                  |                         |                          |                   |                         |                          |
|---------------------------------|-------------------------------|-------------------------|--------------------------|-------------------|-------------------------|--------------------------|
|                                 | H <sub>3</sub> O <sup>+</sup> |                         |                          | AceH <sup>+</sup> |                         |                          |
|                                 | IMP (%)                       | <i>D</i> <sub>avg</sub> | <i>ND</i> <sub>avg</sub> | IMP (%)           | <i>D</i> <sub>avg</sub> | <i>ND</i> <sub>avg</sub> |
| TPSA                            | 7.29                          | 70.5                    | 57.29                    | 8.51              | 69.66                   | 58.87                    |
| n HBD                           | 1.01                          | 0.68                    | 0.49                     | 1.16              | 0.68                    | 0.5                      |
| n HBA                           | 3.8                           | 4.2                     | 3.11                     | 4.57              | 4.15                    | 3.18                     |
| CrippenClogP                    | 4.1                           | 3.15                    | 3.69                     | 4.05              | 3.22                    | 3.54                     |
| FractionCSP3                    | 3.91                          | 0.43                    | 0.36                     | 2.4               | 0.41                    | 0.4                      |
| Mw                              | 3.31                          | 302.17                  | 321.61                   | 3.22              | 304.33                  | 317.3                    |
| amw                             | 3.44                          | 302.69                  | 322.8                    | 3.08              | 304.86                  | 318.45                   |
| lipinskiHBA                     | 7.03                          | 4.59                    | 3.48                     | 7.05              | 4.55                    | 3.54                     |
| lipinskiHBD                     | 0.92                          | 0.73                    | 0.55                     | 1.08              | 0.72                    | 0.55                     |
| NumRotatableBonds               | 2.72                          | 4.53                    | 4.0                      | 1.72              | 4.47                    | 4.13                     |
| NumHeavyAtoms                   | 1.28                          | 19.87                   | 19.02                    | 1.35              | 20.03                   | 18.67                    |
| NumAtoms                        | 4.81                          | 36.29                   | 32.24                    | 4.35              | 36.26                   | 32.24                    |
| NumHeteroatoms                  | 1.76                          | 6.47                    | 6.45                     | 1.81              | 6.44                    | 6.5                      |
| NumAmideBonds                   | 1.97                          | 0.61                    | 0.32                     | 1.82              | 0.61                    | 0.32                     |
| NumRings                        | 0.59                          | 1.67                    | 1.75                     | 0.51              | 1.73                    | 1.64                     |
| NumAromaticRings                | 0.59                          | 1.35                    | 1.2                      | 0.54              | 1.4                     | 1.09                     |
| NumAliphaticRings               | 0.31                          | 0.32                    | 0.55                     | 0.34              | 0.32                    | 0.55                     |
| NumSaturatedRings               | 0.17                          | 0.2                     | 0.37                     | 0.3               | 0.19                    | 0.4                      |
| NumHeterocycles                 | 1.87                          | 0.66                    | 0.32                     | 1.7               | 0.66                    | 0.32                     |
| NumAromaticHeterocycles         | 2.71                          | 0.47                    | 0.17                     | 2.25              | 0.47                    | 0.18                     |
| NumSaturatedHeterocycles        | 0.15                          | 0.11                    | 0.08                     | 0.13              | 0.1                     | 0.09                     |
| NumAliphaticHeterocycles        | 0.23                          | 0.19                    | 0.14                     | 0.14              | 0.19                    | 0.14                     |
| NumSpiroAtoms                   | 0.01                          | 0.01                    | 0.0                      | 0.01              | 0.01                    | 0.01                     |
| NumBridgeheadAtoms              | 0.16                          | 0.01                    | 0.22                     | 0.23              | 0.01                    | 0.22                     |
| NumAtomStereoCenters            | 0.59                          | 0.49                    | 0.78                     | 0.57              | 0.51                    | 0.74                     |
| NumUnspecifiedAtomStereoCenters | 0.46                          | 0.46                    | 0.5                      | 0.37              | 0.45                    | 0.52                     |
| labuteASA                       | 2.49                          | 121.28                  | 123.23                   | 2.47              | 122.23                  | 121.21                   |
| CrippenMR                       | 2.1                           | 77.09                   | 76.02                    | 2.34              | 77.63                   | 74.85                    |
| chi0v                           | 2.11                          | 12.47                   | 12.54                    | 2.13              | 12.52                   | 12.44                    |
| chi1v                           | 2.61                          | 7.37                    | 7.34                     | 3.04              | 7.37                    | 7.33                     |
| chi2v                           | 2.47                          | 4.05                    | 4.64                     | 2.46              | 4.03                    | 4.69                     |
| chi3v                           | 2.46                          | 4.05                    | 4.64                     | 2.47              | 4.03                    | 4.69                     |
| chi4v                           | 2.39                          | 2.75                    | 3.29                     | 2.36              | 2.74                    | 3.32                     |
| chi0n                           | 3.23                          | 11.41                   | 10.4                     | 3.66              | 11.45                   | 10.3                     |
| chi1n                           | 2.61                          | 6.19                    | 5.73                     | 2.93              | 6.22                    | 5.65                     |
| chi2n                           | 2.51                          | 2.82                    | 2.82                     | 2.71              | 2.85                    | 2.76                     |
| chi3n                           | 2.45                          | 2.82                    | 2.82                     | 2.6               | 2.85                    | 2.76                     |
| chi4n                           | 2.25                          | 1.83                    | 1.88                     | 2.13              | 1.84                    | 1.84                     |
| hallKierAlpha                   | 3.58                          | -1.51                   | -0.88                    | 5.41              | -1.55                   | -0.78                    |
| kappa1                          | 2.28                          | 15.37                   | 15.16                    | 2.29              | 15.39                   | 15.1                     |
| kappa2                          | 3.08                          | 6.58                    | 6.37                     | 2.66              | 6.56                    | 6.4                      |
| kappa3                          | 3.64                          | 4.04                    | 4.08                     | 2.64              | 4.0                     | 4.16                     |
| Phi                             | 2.51                          | 5.21                    | 5.27                     | 2.45              | 5.16                    | 5.37                     |





**S6 Additional ML models: NB, SVC (classifiers); linear KRR and RF regressor (regression)**

**Table S20.** Hyperparameters tuning range list for each ML model and each molecular descriptor.

| Model                  | Hyperparameters   | Tuning range                 | Info                                                 |
|------------------------|-------------------|------------------------------|------------------------------------------------------|
| RF regressor           | Max depth         | [20, 40, 60, 80, 100, None]  | The length of each tree, from the root to the leaves |
|                        | Min samples leaf  | [1, 2, 4]                    | Minimum number of samples per leaf                   |
|                        | Min samples split | [2, 5, 10]                   | Minimum number of samples per split                  |
|                        | N estimators      | [100, 500, 1000, 1500, 2000] | Maximum number of estimators                         |
| SVC                    | C                 | [0.1, 1, 10, 100]            | Regularization parameter                             |
|                        | Kernel            | ['rbf','poly','sigmoid']     | Kernel type                                          |
|                        | $\gamma$          | ['scale','auto']             | Kernel coefficient                                   |
| KRR with Linear kernel | None              |                              |                                                      |
| NB                     | None              |                              |                                                      |

**Table S21.** Hyperparameters tuned for NB model with TopFP as the molecular descriptor.

| Reagent ion                   | Training size | Random seed | Hyperparameters |          |                 |
|-------------------------------|---------------|-------------|-----------------|----------|-----------------|
|                               |               |             | TopFP           |          |                 |
|                               |               |             | Fp size         | Max path | N bits per hash |
| Br <sup>-</sup>               | 554           | 555         | 8192            | 7        | 2               |
|                               |               | 8           | 4096            | 8        | 2               |
|                               |               | 52          | 8192            | 7        | 2               |
|                               |               | 1066        | 4096            | 7        | 4               |
|                               |               | 324         | 8192            | 7        | 2               |
| O <sub>2</sub> <sup>-</sup>   | 554           | 555         | 4096            | 7        | 4               |
|                               |               | 8           | 8192            | 9        | 2               |
|                               |               | 52          | 8192            | 8        | 2               |
|                               |               | 1066        | 2048            | 7        | 2               |
|                               |               | 324         | 8192            | 7        | 2               |
| H <sub>3</sub> O <sup>+</sup> | 554           | 555         | 8192            | 8        | 2               |
|                               |               | 8           | 716             | 9        | 8               |
|                               |               | 52          | 2048            | 10       | 16              |
|                               |               | 1066        | 716             | 10       | 16              |
|                               |               | 324         | 8192            | 10       | 2               |
| AceH <sup>+</sup>             | 554           | 555         | 2048            | 10       | 16              |
|                               |               | 8           | 8192            | 7        | 4               |
|                               |               | 52          | 716             | 10       | 8               |
|                               |               | 1066        | 8192            | 7        | 2               |
|                               |               | 324         | 2048            | 10       | 16              |

**Table S22.** Hyperparameters tuned for NB model with MBTR as the molecular descriptor.

| Reagent ion                   | Training size | Random seed | Hyperparameters |       |            |       |
|-------------------------------|---------------|-------------|-----------------|-------|------------|-------|
|                               |               |             | MBTR            |       |            |       |
|                               |               |             | $\sigma_2$      | $w_2$ | $\sigma_3$ | $w_3$ |
| Br <sup>-</sup>               | 554           | 555         | 0.1             | 0.4   | 0.0001     | 0.8   |
|                               |               | 8           | 0.0005          | 0.4   | 0.01       | 0.8   |
|                               |               | 52          | 0.0005          | 0.6   | 0.001      | 0.6   |
|                               |               | 1066        | 0.005           | 1     | 0.0001     | 0.4   |
|                               |               | 324         | 0.0001          | 1.2   | 0.005      | 0.8   |
| O <sub>2</sub> <sup>-</sup>   | 554           | 555         | 0.1             | 0.6   | 0.0005     | 1     |
|                               |               | 8           | 0.005           | 0.2   | 0.0005     | 1     |
|                               |               | 52          | 0.001           | 0.6   | 0.0005     | 0.8   |
|                               |               | 1066        | 0.001           | 0.6   | 0.001      | 0.8   |
|                               |               | 324         | 0.01            | 0.4   | 0.0005     | 0.8   |
| H <sub>3</sub> O <sup>+</sup> | 554           | 555         | 0.1             | 0.8   | 0.005      | 1     |
|                               |               | 8           | 0.0005          | 1.2   | 0.001      | 0.8   |
|                               |               | 52          | 0.001           | 0.2   | 0.005      | 0.8   |
|                               |               | 1066        | 0.001           | 1.2   | 0.0001     | 0.8   |
|                               |               | 324         | 0.0005          | 0.6   | 0.005      | 0.8   |
| AceH <sup>+</sup>             | 554           | 555         | 0.0005          | 0.8   | 0.0001     | 1     |
|                               |               | 8           | 0.001           | 0.6   | 0.0001     | 1     |
|                               |               | 52          | 0.01            | 0.4   | 0.1        | 0.8   |
|                               |               | 1066        | 0.001           | 0.8   | 0.005      | 1     |
|                               |               | 324         | 0.001           | 0.6   | 0.1        | 0.2   |

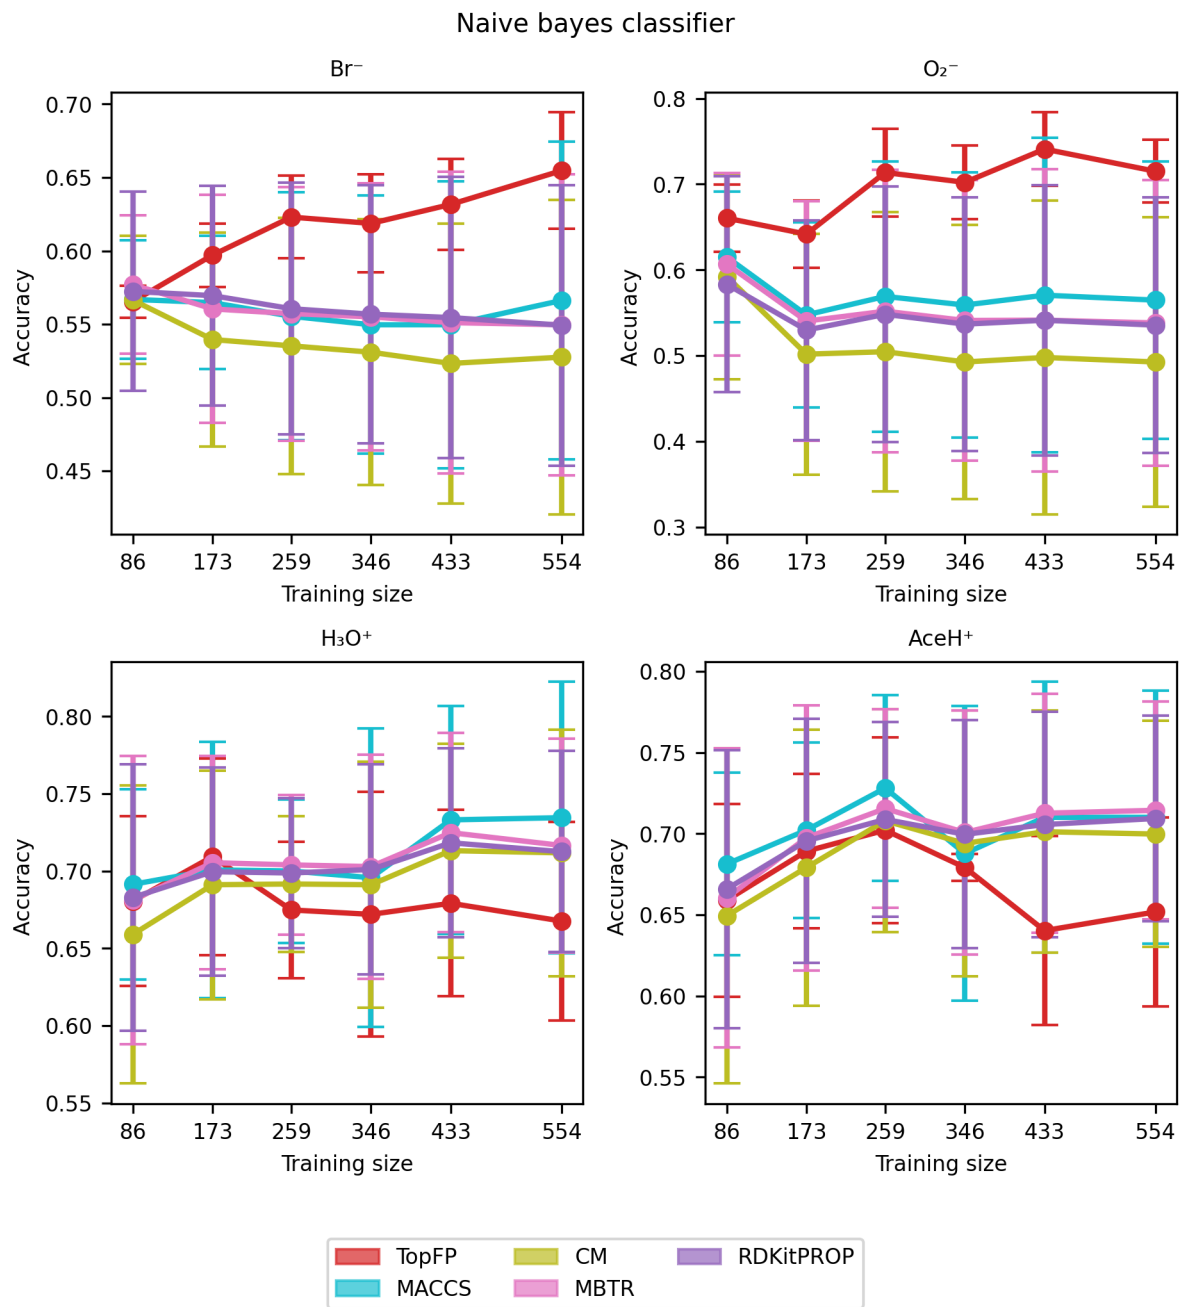

**Figure S13.** Learning curve of the naive bayes with the accuracy of the classification of  $\text{Br}^-$ ,  $\text{O}_2^-$ ,  $\text{H}_3\text{O}^+$  and  $\text{AceH}^+$  datasets, based on the TopFP, MACCS, CM, MBTR and properties as the descriptors. The x-axis reports the training set size, the y-axis reports the classification accuracy. The mean value and standard deviation are obtained by repeating the training with five different random re-shuffling of the dataset.

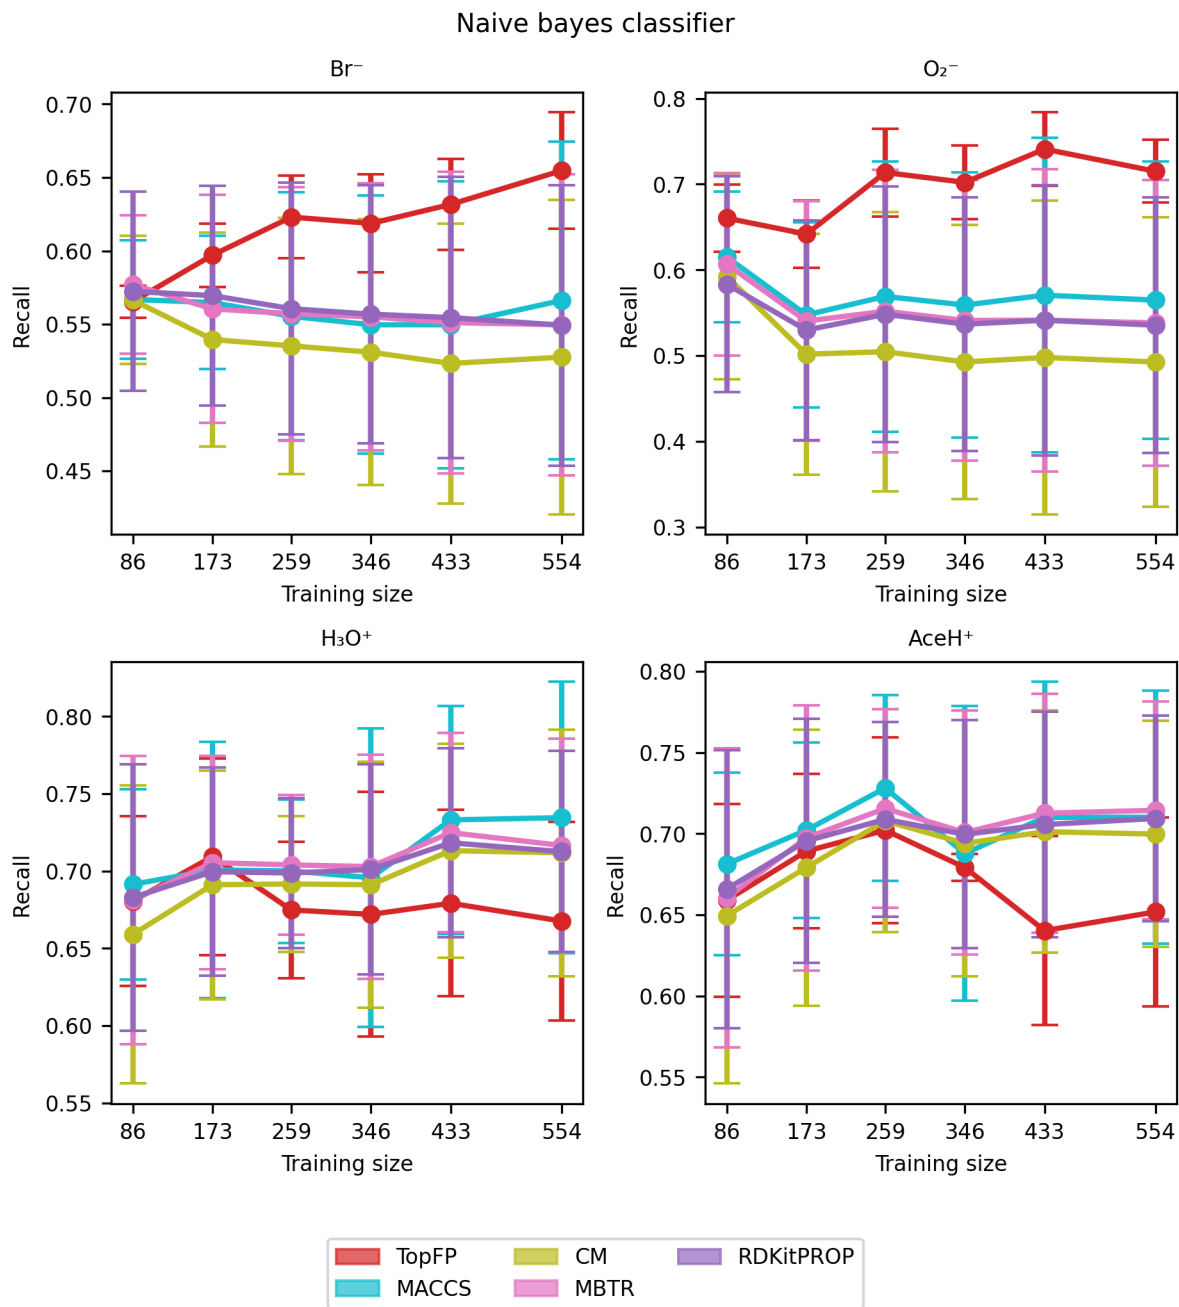

**Figure S14.** Learning curve of the naive bayes with the recall of the classification of  $\text{Br}^-$ ,  $\text{O}_2^-$ ,  $\text{H}_3\text{O}^+$  and  $\text{AceH}^+$  datasets, based on the TopFP, MACCS, CM, MBTR and properties as the descriptors. The x-axis reports the training set size, the y-axis reports the classification recall. The mean value and standard deviation are obtained by repeating the training with five different random re-shuffling of the dataset.

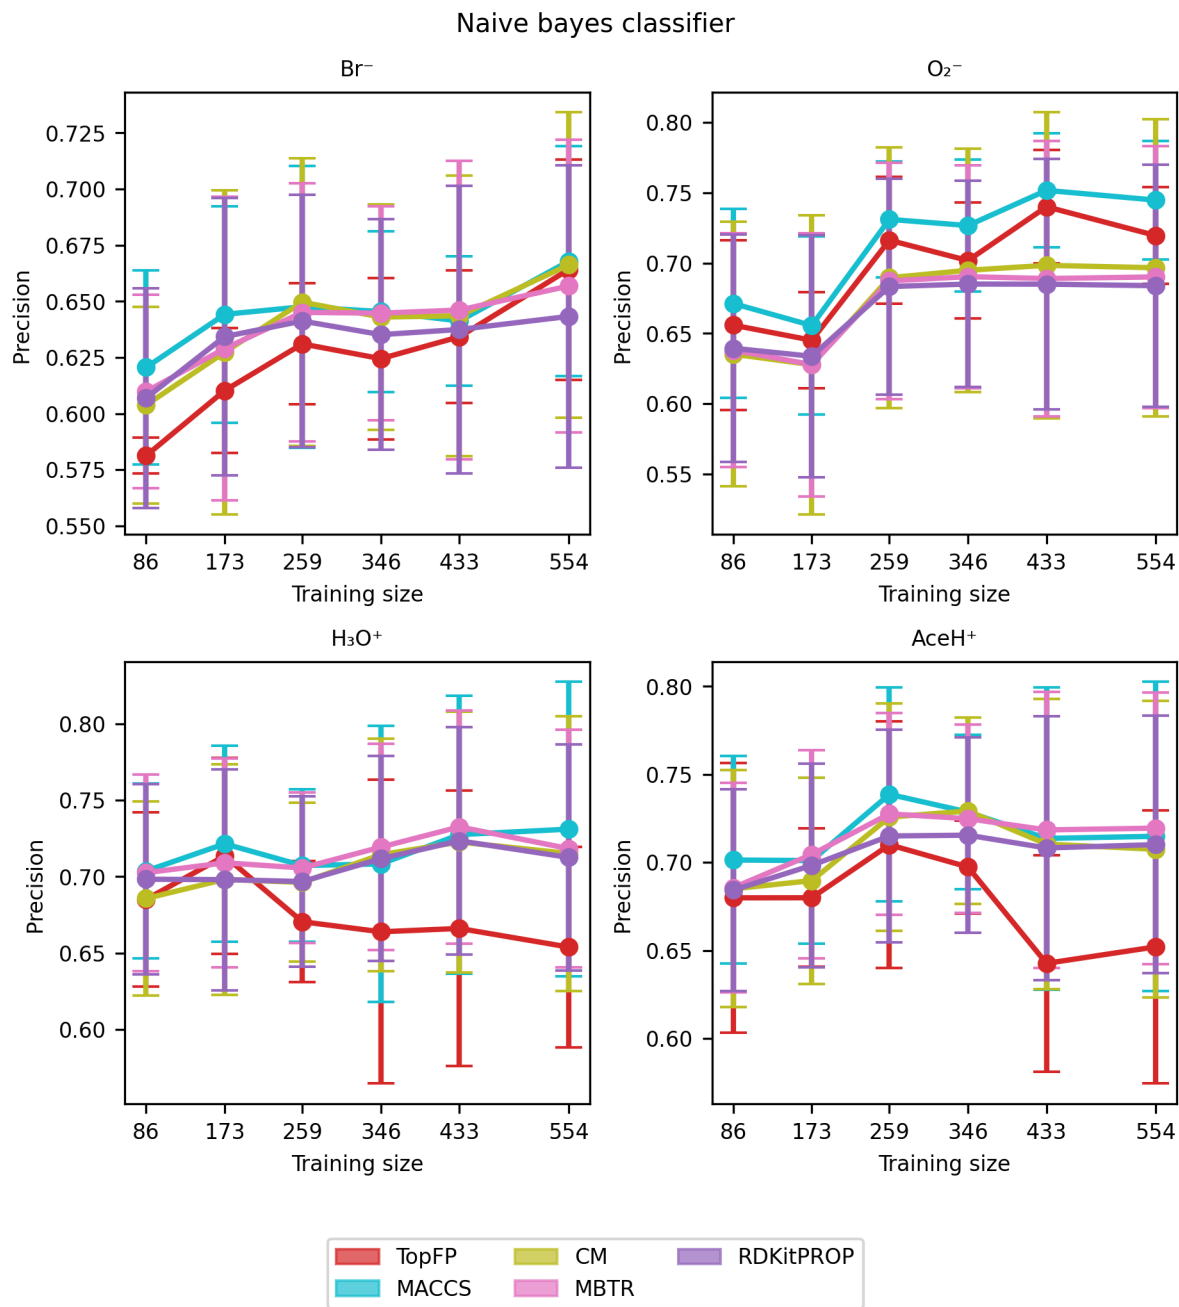

**Figure S15.** Learning curve of the naive bayes with the precision of the classification of Br<sup>-</sup>, O<sub>2</sub><sup>-</sup>, H<sub>3</sub>O<sup>+</sup> and AceH<sup>+</sup> datasets, based on the TopFP, MACCS, CM, MBTR and properties as the descriptors. The x-axis reports the training set size, the y-axis reports the classification precision. The mean value and standard deviation are obtained by repeating the training with five different random re-shuffling of the dataset.

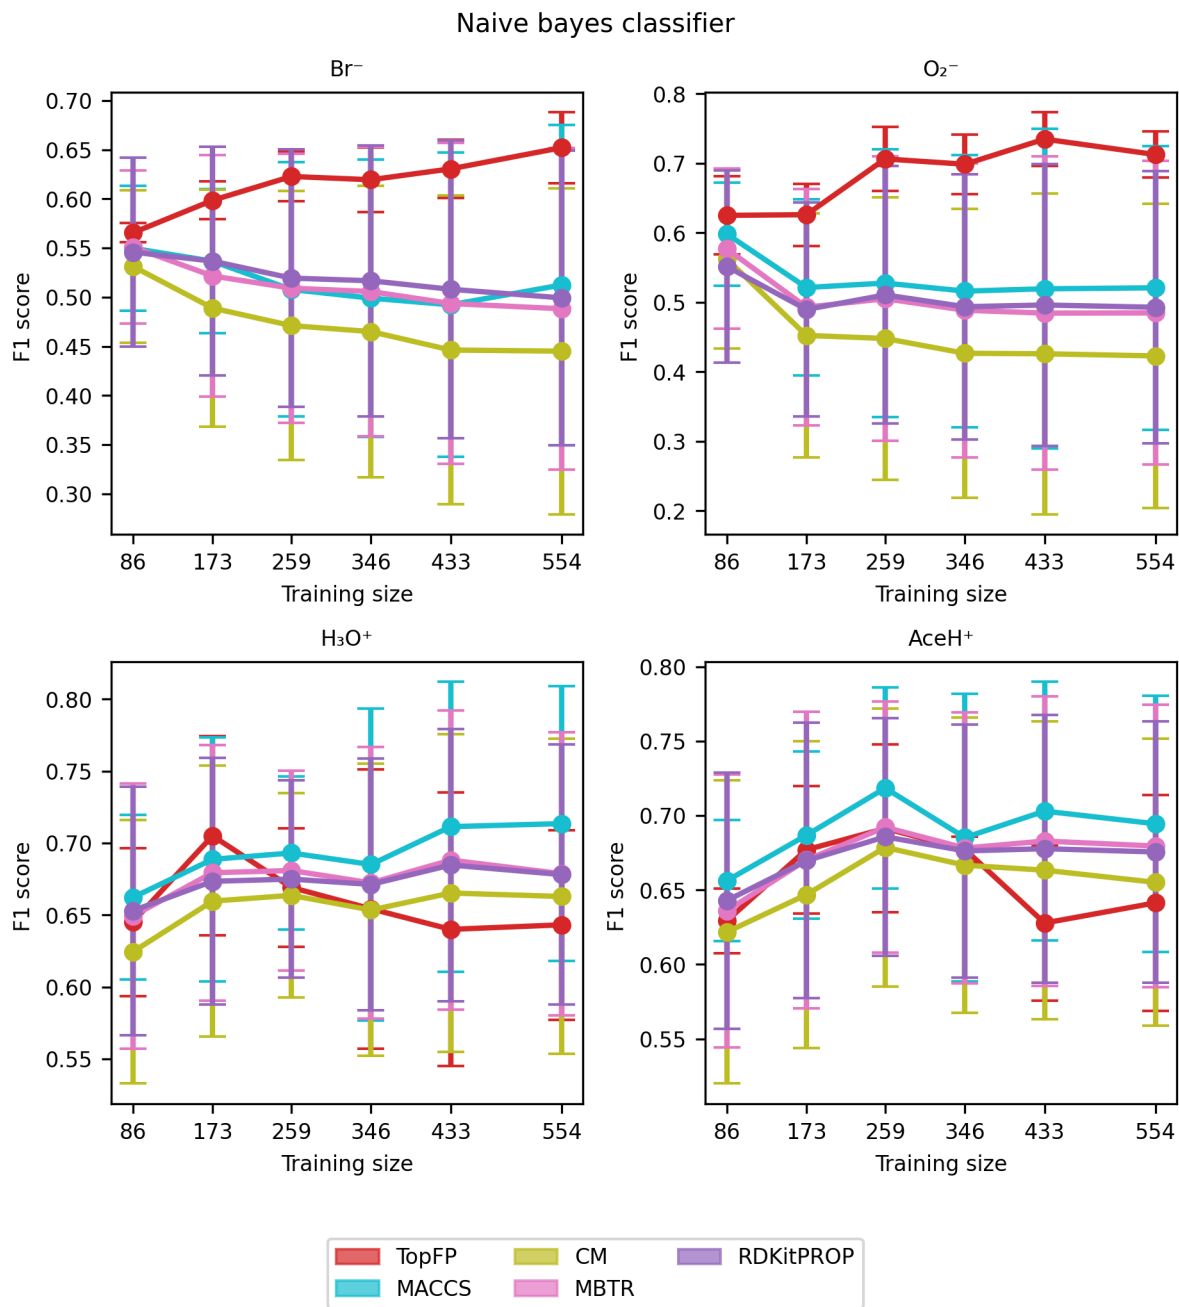

**Figure S16.** Learning curve of the naive bayes with the F1 score of the classification of  $\text{Br}^-$ ,  $\text{O}_2^-$ ,  $\text{H}_3\text{O}^+$  and  $\text{AceH}^+$  datasets, based on the TopFP, MACCS, CM, MBTR and properties as the descriptors. The x-axis reports the training set size, the y-axis reports the classification F1 score. The mean value and standard deviation are obtained by repeating the training with five different random re-shuffling of the dataset.

**Table S23.** Hyperparameters tuned for SVC model with RDKitPROP as the molecular descriptor.

| Reagent ion                   | Training size | Random seed | Hyperparameters |        |          |
|-------------------------------|---------------|-------------|-----------------|--------|----------|
|                               |               |             | SVC             |        |          |
|                               |               |             | C               | Kernel | $\gamma$ |
| Br <sup>-</sup>               | 554           | 555         | 100             | rbf    | auto     |
|                               |               | 8           | 100             | rbf    | auto     |
|                               |               | 52          | 1               | rbf    | auto     |
|                               |               | 1066        | 10              | rbf    | auto     |
|                               |               | 324         | 100             | rbf    | auto     |
| O <sub>2</sub> <sup>-</sup>   | 554           | 555         | 100             | rbf    | auto     |
|                               |               | 8           | 10              | rbf    | auto     |
|                               |               | 52          | 10              | rbf    | auto     |
|                               |               | 1066        | 100             | rbf    | auto     |
|                               |               | 324         | 10              | rbf    | auto     |
| H <sub>3</sub> O <sup>+</sup> | 554           | 555         | 10              | rbf    | scale    |
|                               |               | 8           | 100             | rbf    | scale    |
|                               |               | 52          | 10              | rbf    | scale    |
|                               |               | 1066        | 1               | rbf    | auto     |
|                               |               | 324         | 10              | rbf    | scale    |
| AceH <sup>+</sup>             | 554           | 555         | 100             | rbf    | scale    |
|                               |               | 8           | 100             | rbf    | scale    |
|                               |               | 52          | 100             | rbf    | scale    |
|                               |               | 1066        | 100             | rbf    | scale    |
|                               |               | 324         | 100             | rbf    | scale    |

**Table S24.** Hyperparameters tuned for SVC model with TopFP as the molecular descriptor.

| Reagent ion                   | Training size | Random seed | Hyperparameters |          |                 |     |         |          |
|-------------------------------|---------------|-------------|-----------------|----------|-----------------|-----|---------|----------|
|                               |               |             | TopFP           |          |                 | SVC |         |          |
|                               |               |             | Fp size         | Max path | N bits per hash | C   | Kernel  | $\gamma$ |
| Br <sup>-</sup>               | 554           | 555         | 4096            | 9        | 8               | 1   | poly    | scale    |
|                               |               | 8           | 8192            | 7        | 4               | 10  | rbf     | scale    |
|                               |               | 52          | 8192            | 7        | 16              | 100 | poly    | auto     |
|                               |               | 1066        | 8192            | 8        | 8               | 10  | rbf     | auto     |
|                               |               | 324         | 4096            | 7        | 16              | 0.1 | poly    | scale    |
| O <sub>2</sub> <sup>-</sup>   | 554           | 555         | 2048            | 9        | 2               | 10  | rbf     | auto     |
|                               |               | 8           | 2048            | 7        | 2               | 100 | rbf     | scale    |
|                               |               | 52          | 2048            | 7        | 2               | 10  | rbf     | auto     |
|                               |               | 1066        | 4096            | 10       | 4               | 100 | rbf     | scale    |
|                               |               | 324         | 2048            | 9        | 4               | 1   | poly    | scale    |
| H <sub>3</sub> O <sup>+</sup> | 554           | 555         | 8192            | 8        | 4               | 100 | rbf     | scale    |
|                               |               | 8           | 2048            | 9        | 2               | 1   | poly    | scale    |
|                               |               | 52          | 8192            | 9        | 4               | 10  | sigmoid | auto     |
|                               |               | 1066        | 4096            | 9        | 4               | 100 | rbf     | auto     |
|                               |               | 324         | 8192            | 7        | 8               | 10  | poly    | scale    |
| AceH <sup>+</sup>             | 554           | 555         | 4096            | 8        | 8               | 10  | poly    | scale    |
|                               |               | 8           | 8192            | 7        | 2               | 1   | rbf     | scale    |
|                               |               | 52          | 4096            | 7        | 4               | 100 | rbf     | scale    |
|                               |               | 1066        | 4096            | 9        | 2               | 100 | rbf     | auto     |
|                               |               | 324         | 2048            | 9        | 4               | 10  | poly    | auto     |

**Table S25.** Hyperparameters tuned for SVC model with MACCS as the molecular descriptor.

| Reagent ion                   | Training size | Random seed | Hyperparameters |         |          |
|-------------------------------|---------------|-------------|-----------------|---------|----------|
|                               |               |             | SVC             |         |          |
|                               |               |             | C               | Kernel  | $\gamma$ |
| Br <sup>-</sup>               | 554           | 555         | 10              | rbf     | scale    |
|                               |               | 8           | 10              | rbf     | scale    |
|                               |               | 52          | 1               | rbf     | scale    |
|                               |               | 1066        | 1               | poly    | scale    |
|                               |               | 324         | 100             | rbf     | scale    |
| O <sub>2</sub> <sup>-</sup>   | 554           | 555         | 10              | rbf     | auto     |
|                               |               | 8           | 100             | rbf     | scale    |
|                               |               | 52          | 10              | rbf     | auto     |
|                               |               | 1066        | 100             | rbf     | scale    |
|                               |               | 324         | 100             | rbf     | scale    |
| H <sub>3</sub> O <sup>+</sup> | 554           | 555         | 10              | rbf     | scale    |
|                               |               | 8           | 10              | sigmoid | auto     |
|                               |               | 52          | 10              | rbf     | auto     |
|                               |               | 1066        | 10              | rbf     | auto     |
|                               |               | 324         | 10              | rbf     | auto     |
| AceH <sup>+</sup>             | 554           | 555         | 10              | sigmoid | auto     |
|                               |               | 8           | 10              | rbf     | auto     |
|                               |               | 52          | 10              | rbf     | scale    |
|                               |               | 1066        | 100             | poly    | auto     |
|                               |               | 324         | 1               | poly    | scale    |

**Table S26.** Hyperparameters tuned for SVC model with CM as the molecular descriptor.

| Reagent ion                   | Training size | Random seed | Hyperparameters |         |          |
|-------------------------------|---------------|-------------|-----------------|---------|----------|
|                               |               |             | SVC             |         |          |
|                               |               |             | C               | Kernel  | $\gamma$ |
| Br <sup>-</sup>               | 554           | 555         | 100             | rbf     | auto     |
|                               |               | 8           | 100             | rbf     | auto     |
|                               |               | 52          | 10              | rbf     | auto     |
|                               |               | 1066        | 100             | rbf     | scale    |
|                               |               | 324         | 100             | rbf     | scale    |
| O <sub>2</sub> <sup>-</sup>   | 554           | 555         | 1               | rbf     | auto     |
|                               |               | 8           | 1               | rbf     | auto     |
|                               |               | 52          | 1               | rbf     | auto     |
|                               |               | 1066        | 10              | rbf     | auto     |
|                               |               | 324         | 10              | rbf     | auto     |
| H <sub>3</sub> O <sup>+</sup> | 554           | 555         | 1               | rbf     | scale    |
|                               |               | 8           | 100             | rbf     | scale    |
|                               |               | 52          | 1               | poly    | scale    |
|                               |               | 1066        | 100             | rbf     | auto     |
|                               |               | 324         | 10              | rbf     | scale    |
| AceH <sup>+</sup>             | 554           | 555         | 0.1             | poly    | scale    |
|                               |               | 8           | 10              | rbf     | scale    |
|                               |               | 52          | 10              | poly    | scale    |
|                               |               | 1066        | 100             | rbf     | scale    |
|                               |               | 324         | 1               | sigmoid | scale    |

**Table S27.** Hyperparameters tuned for SVC model with MBTR as the molecular descriptor.

| Reagent ion                   | Training size | Random seed | Hyperparameters |       |            |       |     |         |          |
|-------------------------------|---------------|-------------|-----------------|-------|------------|-------|-----|---------|----------|
|                               |               |             | MBTR            |       |            |       | SVC |         |          |
|                               |               |             | $\sigma_2$      | $w_2$ | $\sigma_3$ | $w_3$ | C   | Kernel  | $\gamma$ |
| Br <sup>-</sup>               | 554           | 555         | 0.1             | 0.4   | 0.005      | 0.6   | 10  | rbf     | scale    |
|                               |               | 8           | 0.1             | 0.2   | 0.1        | 1.2   | 10  | poly    | scale    |
|                               |               | 52          | 0.1             | 1.2   | 0.001      | 0.6   | 10  | poly    | scale    |
|                               |               | 1066        | 0.001           | 0.2   | 0.1        | 0.6   | 10  | rbf     | scale    |
|                               |               | 324         | 0.01            | 0.8   | 0.0001     | 0.6   | 100 | rbf     | scale    |
| O <sub>2</sub> <sup>-</sup>   | 554           | 555         | 0.0001          | 0.4   | 0.01       | 1.2   | 10  | rbf     | scale    |
|                               |               | 8           | 0.1             | 0.6   | 0.0005     | 0.6   | 100 | rbf     | scale    |
|                               |               | 52          | 0.0001          | 0.2   | 0.01       | 1     | 1   | sigmoid | scale    |
|                               |               | 1066        | 0.01            | 0.4   | 0.1        | 1.2   | 100 | rbf     | scale    |
|                               |               | 324         | 0.001           | 1.2   | 0.1        | 1.2   | 10  | rbf     | scale    |
| H <sub>3</sub> O <sup>+</sup> | 554           | 555         | 0.005           | 0.4   | 0.0001     | 1.2   | 1   | poly    | scale    |
|                               |               | 8           | 0.1             | 1.2   | 0.0005     | 0.6   | 1   | poly    | scale    |
|                               |               | 52          | 0.1             | 0.8   | 0.01       | 0.8   | 100 | rbf     | scale    |
|                               |               | 1066        | 0.1             | 0.4   | 0.005      | 0.2   | 10  | poly    | scale    |
|                               |               | 324         | 0.001           | 1.2   | 0.001      | 0.8   | 100 | rbf     | scale    |
| AcceH <sup>+</sup>            | 554           | 555         | 0.001           | 0.8   | 0.005      | 0.8   | 10  | rbf     | scale    |
|                               |               | 8           | 0.01            | 1.2   | 0.01       | 0.2   | 1   | poly    | scale    |
|                               |               | 52          | 0.005           | 1     | 0.001      | 1.2   | 10  | poly    | scale    |
|                               |               | 1066        | 0.005           | 0.2   | 0.001      | 1     | 100 | rbf     | scale    |
|                               |               | 324         | 0.01            | 1.2   | 0.1        | 0.4   | 0.1 | sigmoid | scale    |

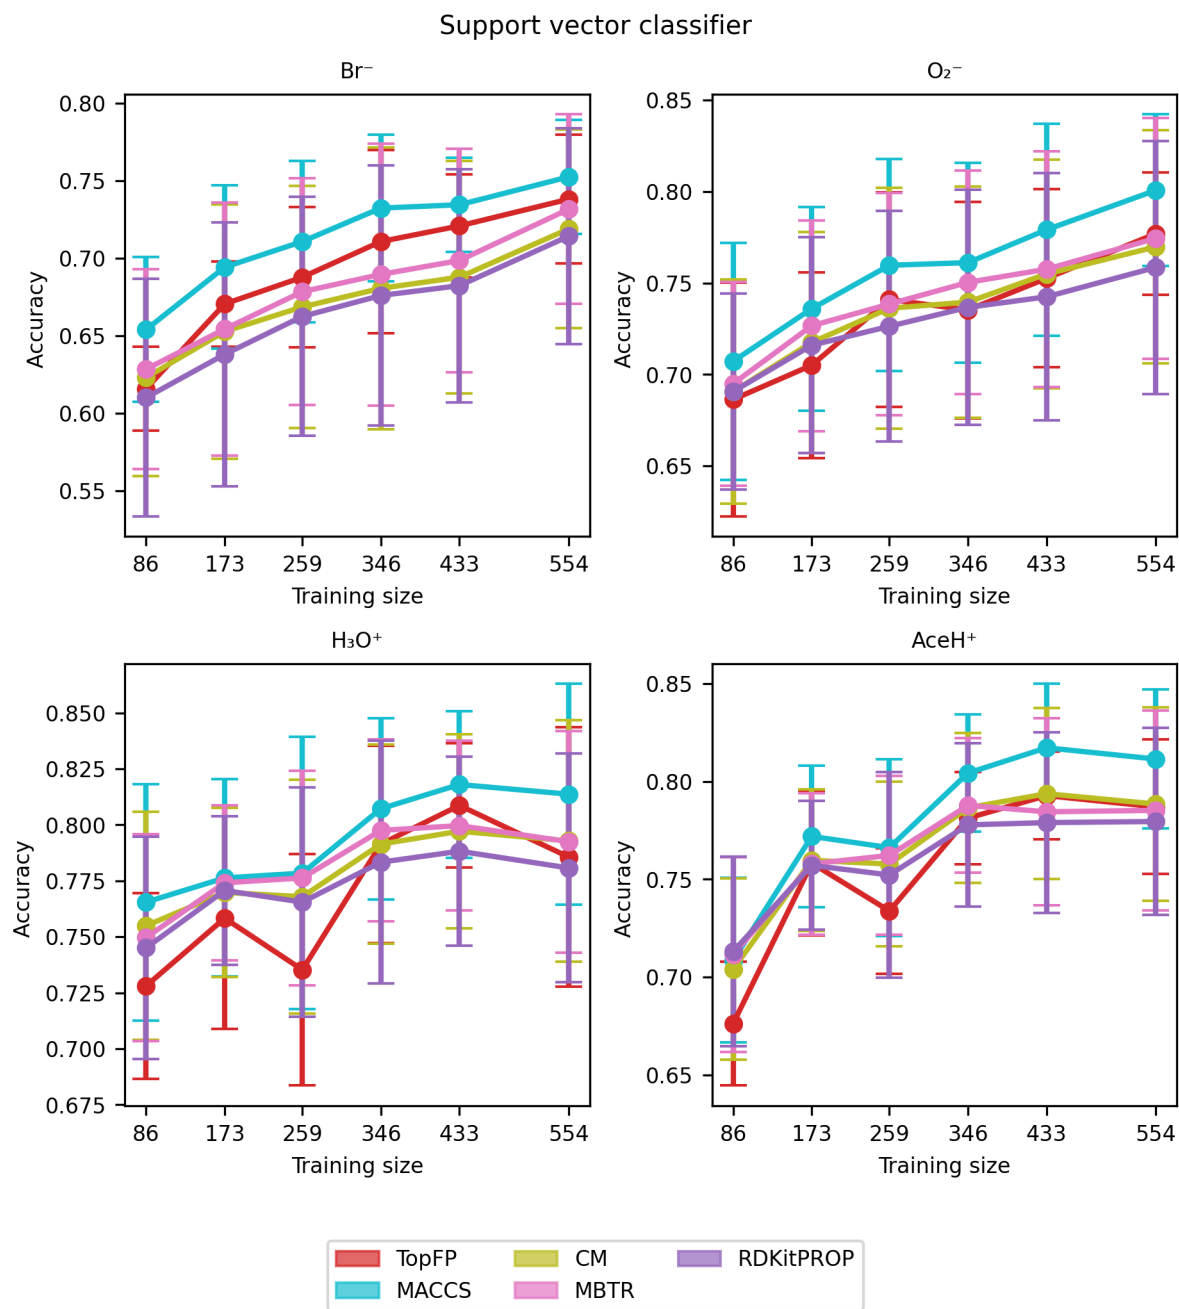

**Figure S17.** Learning curve of the support vector classifier with the accuracy of the classification of  $\text{Br}^-$ ,  $\text{O}_2^-$ ,  $\text{H}_3\text{O}^+$  and  $\text{AceH}^+$  datasets, based on the TopFP, MACCS, CM, MBTR and properties as the descriptors. The x-axis reports the training set size, the y-axis reports the classification accuracy. The mean value and standard deviation are obtained by repeating the training with five different random re-shuffling of the dataset.

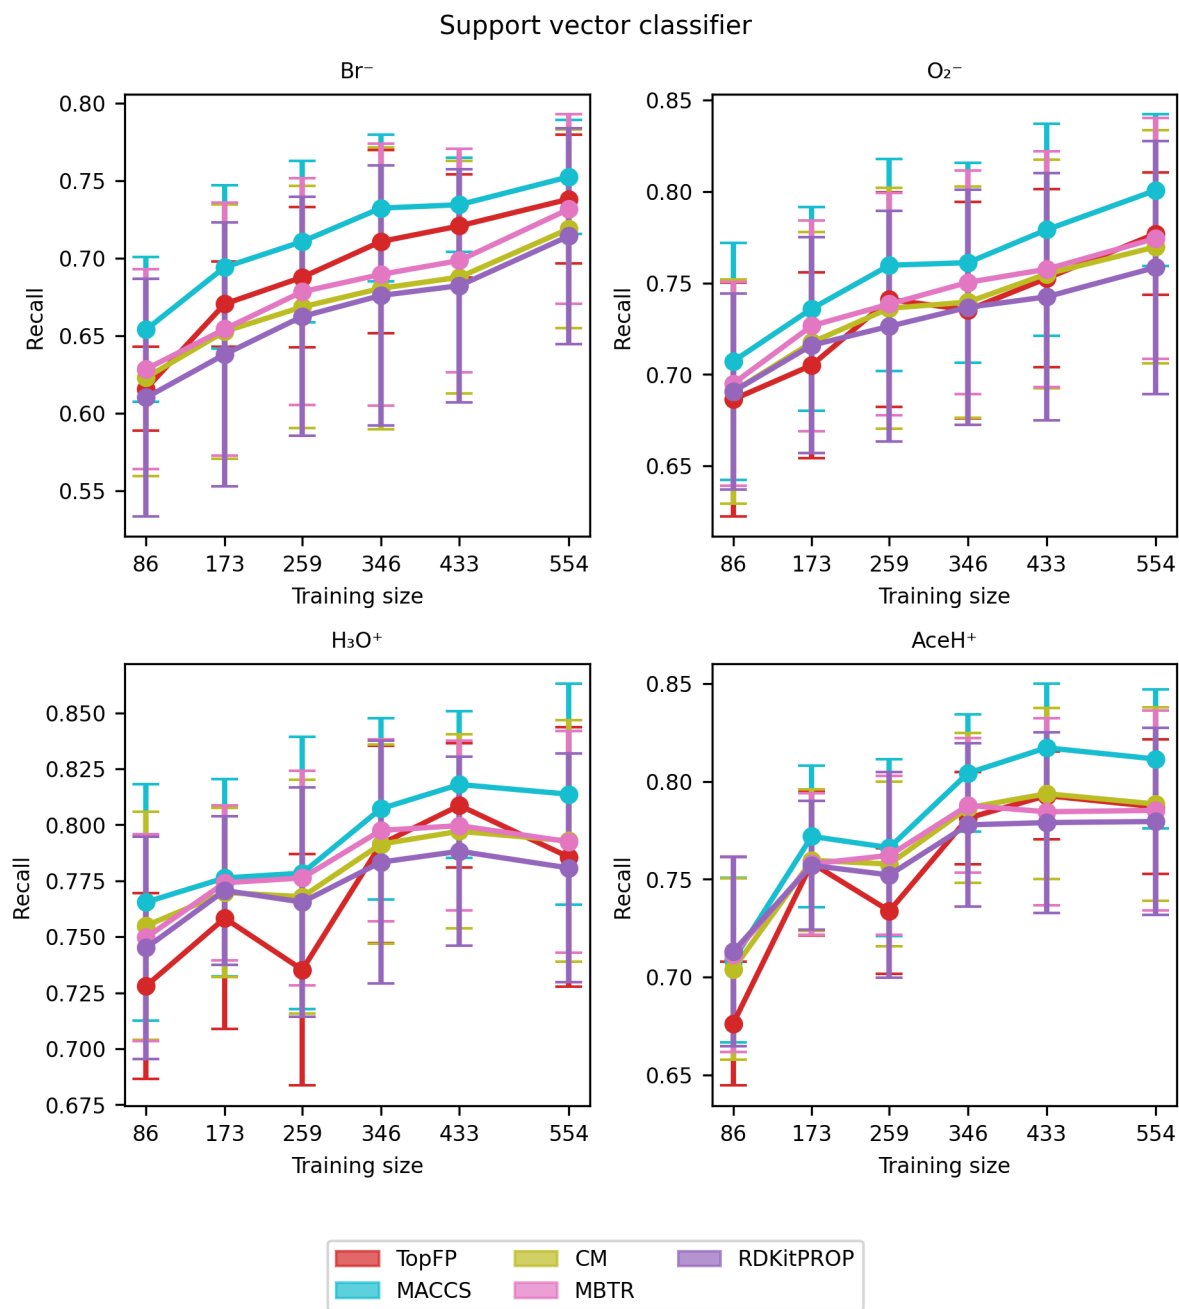

**Figure S18.** Learning curve of the support vector classifier with the recall of the classification of Br<sup>-</sup>, O<sub>2</sub><sup>-</sup>, H<sub>3</sub>O<sup>+</sup> and AceH<sup>+</sup> datasets, based on the TopFP, MACCS, CM, MBTR and properties as the descriptors. The x-axis reports the training set size, the y-axis reports the classification recall. The mean value and standard deviation are obtained by repeating the training with five different random re-shuffling of the dataset.

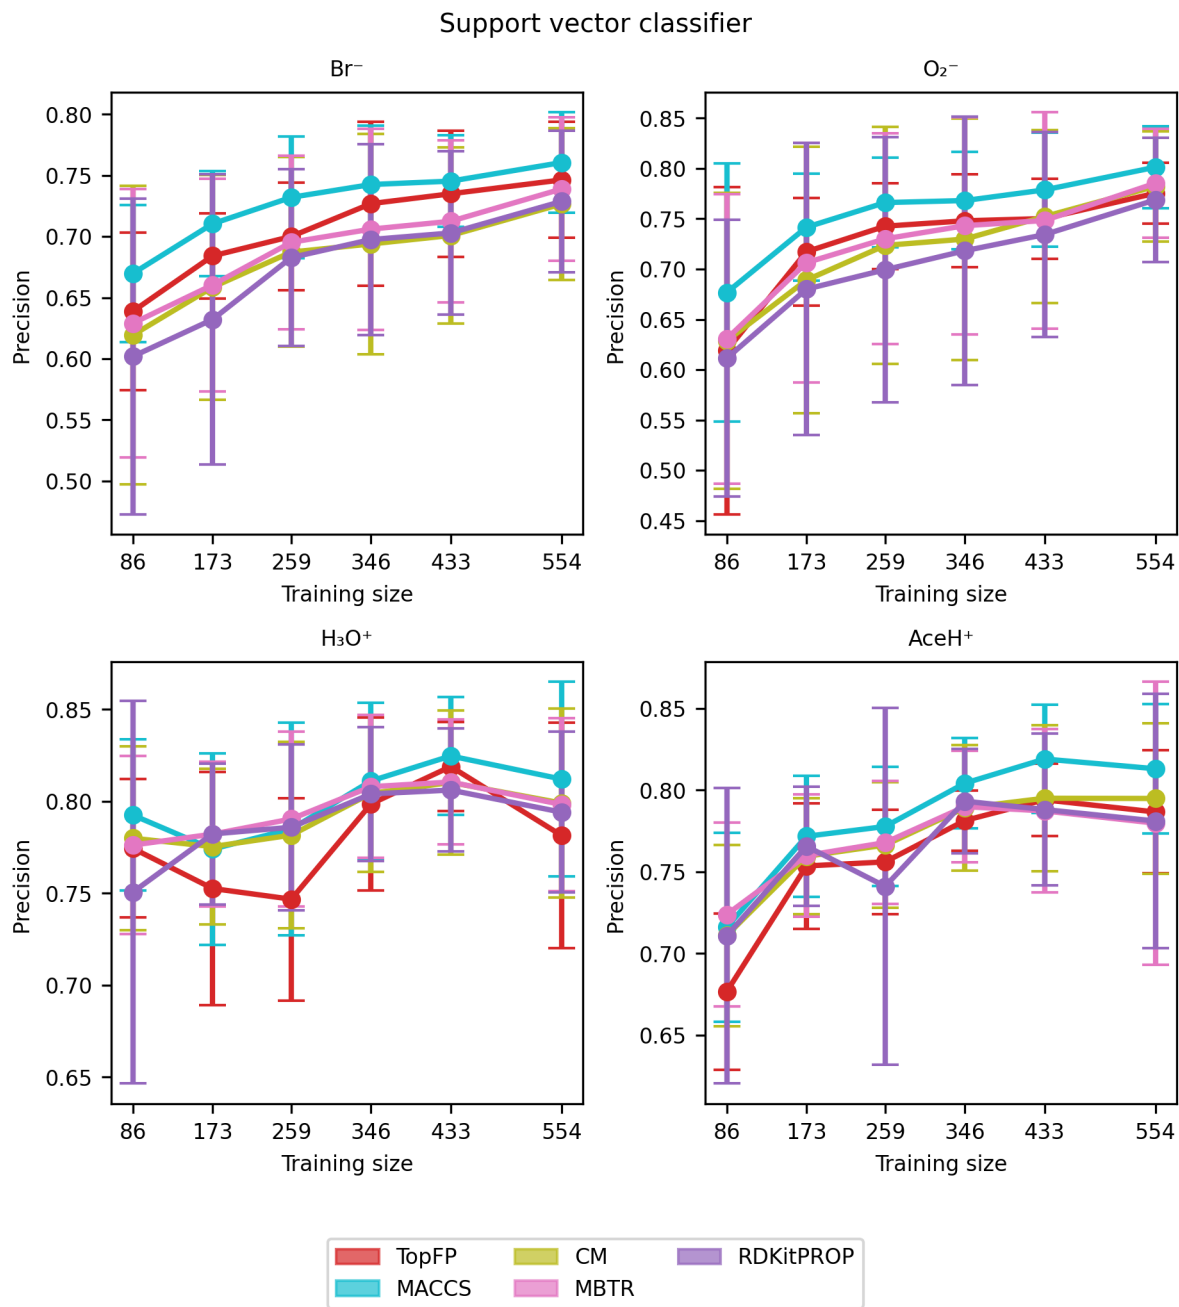

**Figure S19.** Learning curve of the support vector classifier with the precision of the classification of Br<sup>-</sup>, O<sub>2</sub><sup>-</sup>, H<sub>3</sub>O<sup>+</sup> and AceH<sup>+</sup> datasets, based on the TopFP, MACCS, CM, MBTR and properties as the descriptors. The x-axis reports the training set size, the y-axis reports the classification precision. The mean value and standard deviation are obtained by repeating the training with five different random re-shuffling of the dataset.

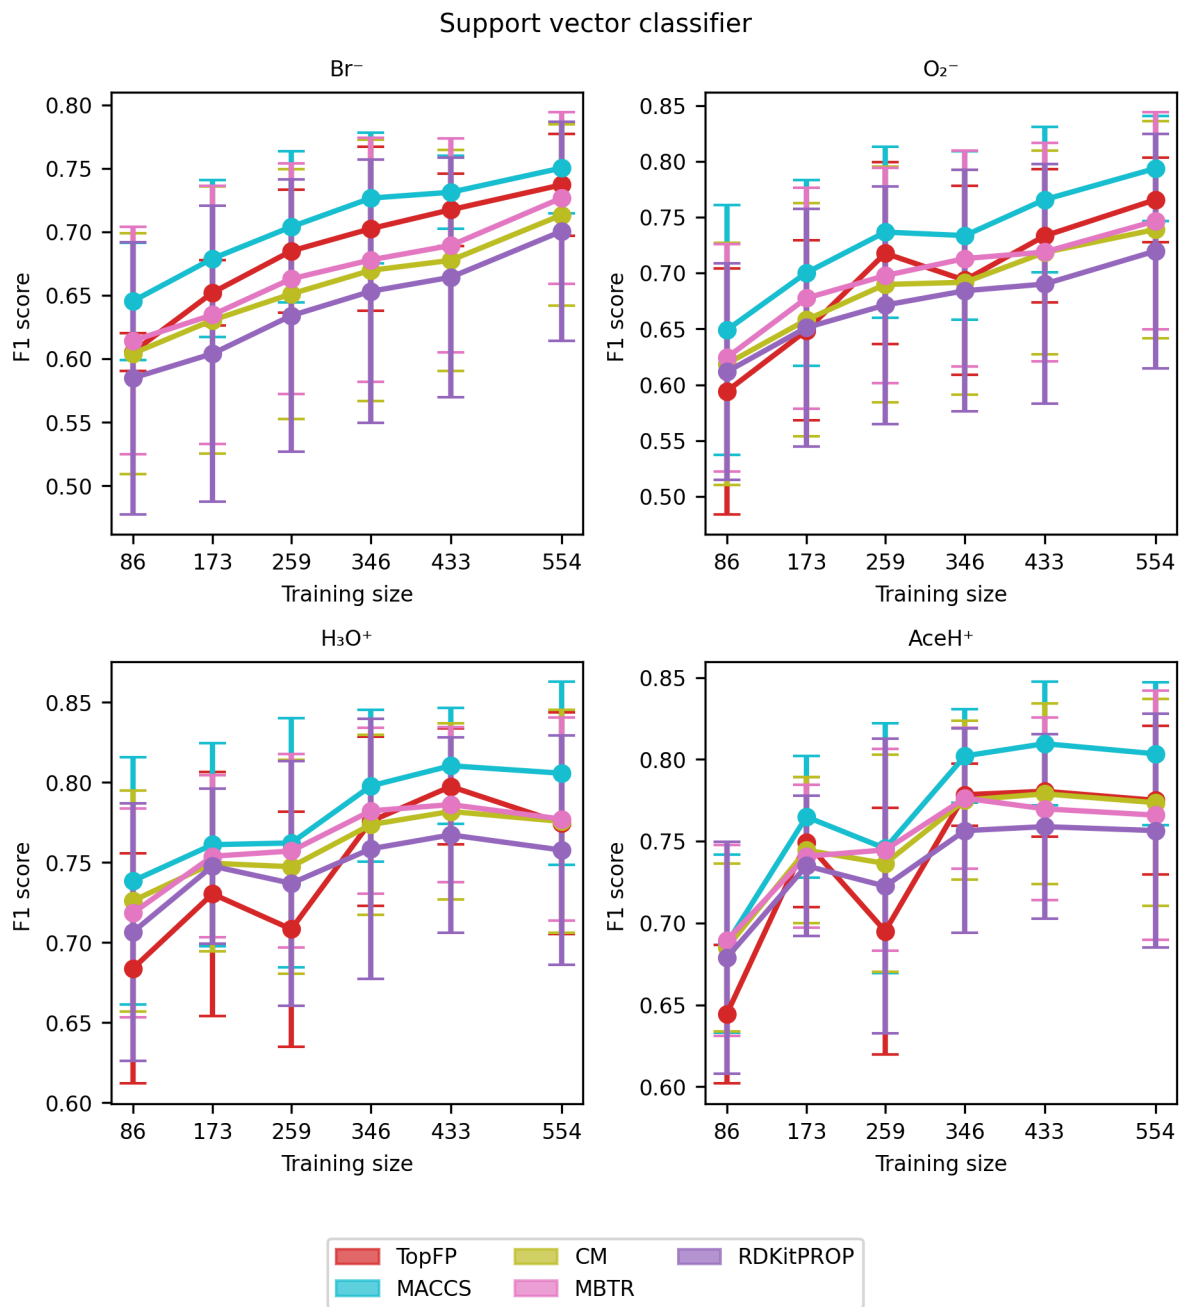

**Figure S20.** Learning curve of the support vector classifier with the F1 score of the classification of  $\text{Br}^-$ ,  $\text{O}_2^-$ ,  $\text{H}_3\text{O}^+$  and  $\text{AceH}^+$  datasets, based on the TopFP, MACCS, CM, MBTR and properties as the descriptors. The x-axis reports the training set size, the y-axis reports the classification F1 score. The mean value and standard deviation are obtained by repeating the training with five different random re-shuffling of the dataset.

**Table S28.** Hyperparameters tuned for KRR with Linear kernel model with TopFP as the molecular descriptor.

| Reagent ion                   | Training size | Random seed | Hyperparameters |          |                 |
|-------------------------------|---------------|-------------|-----------------|----------|-----------------|
|                               |               |             | TopFP           |          |                 |
|                               |               |             | Fp size         | Max path | N bits per hash |
| Br <sup>-</sup>               | 240           | 555         | 716             | 8        | 2               |
|                               |               | 8           | 2048            | 9        | 2               |
|                               |               | 52          | 2048            | 7        | 8               |
|                               |               | 1066        | 2048            | 7        | 4               |
|                               |               | 324         | 8192            | 7        | 16              |
| O <sub>2</sub> <sup>-</sup>   | 174           | 555         | 716             | 8        | 16              |
|                               |               | 8           | 2048            | 8        | 4               |
|                               |               | 52          | 2048            | 9        | 16              |
|                               |               | 1066        | 716             | 9        | 16              |
|                               |               | 324         | 716             | 7        | 16              |
| H <sub>3</sub> O <sup>+</sup> | 376           | 555         | 4096            | 7        | 16              |
|                               |               | 8           | 716             | 9        | 16              |
|                               |               | 52          | 8192            | 7        | 16              |
|                               |               | 1066        | 716             | 8        | 16              |
|                               |               | 324         | 2048            | 7        | 16              |
| AceH <sup>+</sup>             | 379           | 555         | 8192            | 8        | 16              |
|                               |               | 8           | 4096            | 8        | 8               |
|                               |               | 52          | 716             | 8        | 16              |
|                               |               | 1066        | 4096            | 7        | 16              |
|                               |               | 324         | 4096            | 7        | 8               |

**Table S29.** Hyperparameters tuned for KRR with Linear kernel model with MBTR as the molecular descriptor.

| Reagent ion                   | Training size | Random seed | Hyperparameters |                |            |                |
|-------------------------------|---------------|-------------|-----------------|----------------|------------|----------------|
|                               |               |             | MBTR            |                |            |                |
|                               |               |             | $\sigma_2$      | w <sub>2</sub> | $\sigma_3$ | w <sub>3</sub> |
| Br <sup>-</sup>               | 240           | 555         | 0.01            | 0.2            | 0.001      | 0.4            |
|                               |               | 8           | 0.001           | 0.2            | 0.01       | 0.8            |
|                               |               | 52          | 0.0001          | 0.4            | 0.1        | 0.4            |
|                               |               | 1066        | 0.0001          | 0.2            | 0.1        | 1.2            |
|                               |               | 324         | 0.01            | 0.4            | 0.001      | 0.2            |
| O <sub>2</sub> <sup>-</sup>   | 174           | 555         | 0.1             | 0.2            | 0.001      | 0.2            |
|                               |               | 8           | 0.001           | 0.2            | 0.01       | 0.2            |
|                               |               | 52          | 0.01            | 0.4            | 0.3        | 0.4            |
|                               |               | 1066        | 0.01            | 0.4            | 0.0001     | 0.8            |
|                               |               | 324         | 0.01            | 0.2            | 0.3        | 1.4            |
| H <sub>3</sub> O <sup>+</sup> | 376           | 555         | 0.0001          | 0.4            | 0.3        | 0.2            |
|                               |               | 8           | 0.3             | 0.2            | 0.01       | 0.2            |
|                               |               | 52          | 0.1             | 0.2            | 0.0001     | 0.2            |
|                               |               | 1066        | 0.1             | 0.4            | 0.01       | 0.2            |
|                               |               | 324         | 0.3             | 0.4            | 0.001      | 0.2            |
| AceH <sup>+</sup>             | 379           | 555         | 0.01            | 0.2            | 0.001      | 0.2            |
|                               |               | 8           | 0.01            | 0.2            | 0.0001     | 0.4            |
|                               |               | 52          | 0.01            | 0.2            | 0.0001     | 0.2            |
|                               |               | 1066        | 0.01            | 0.2            | 0.01       | 0.4            |
|                               |               | 324         | 0.01            | 0.2            | 0.001      | 0.8            |

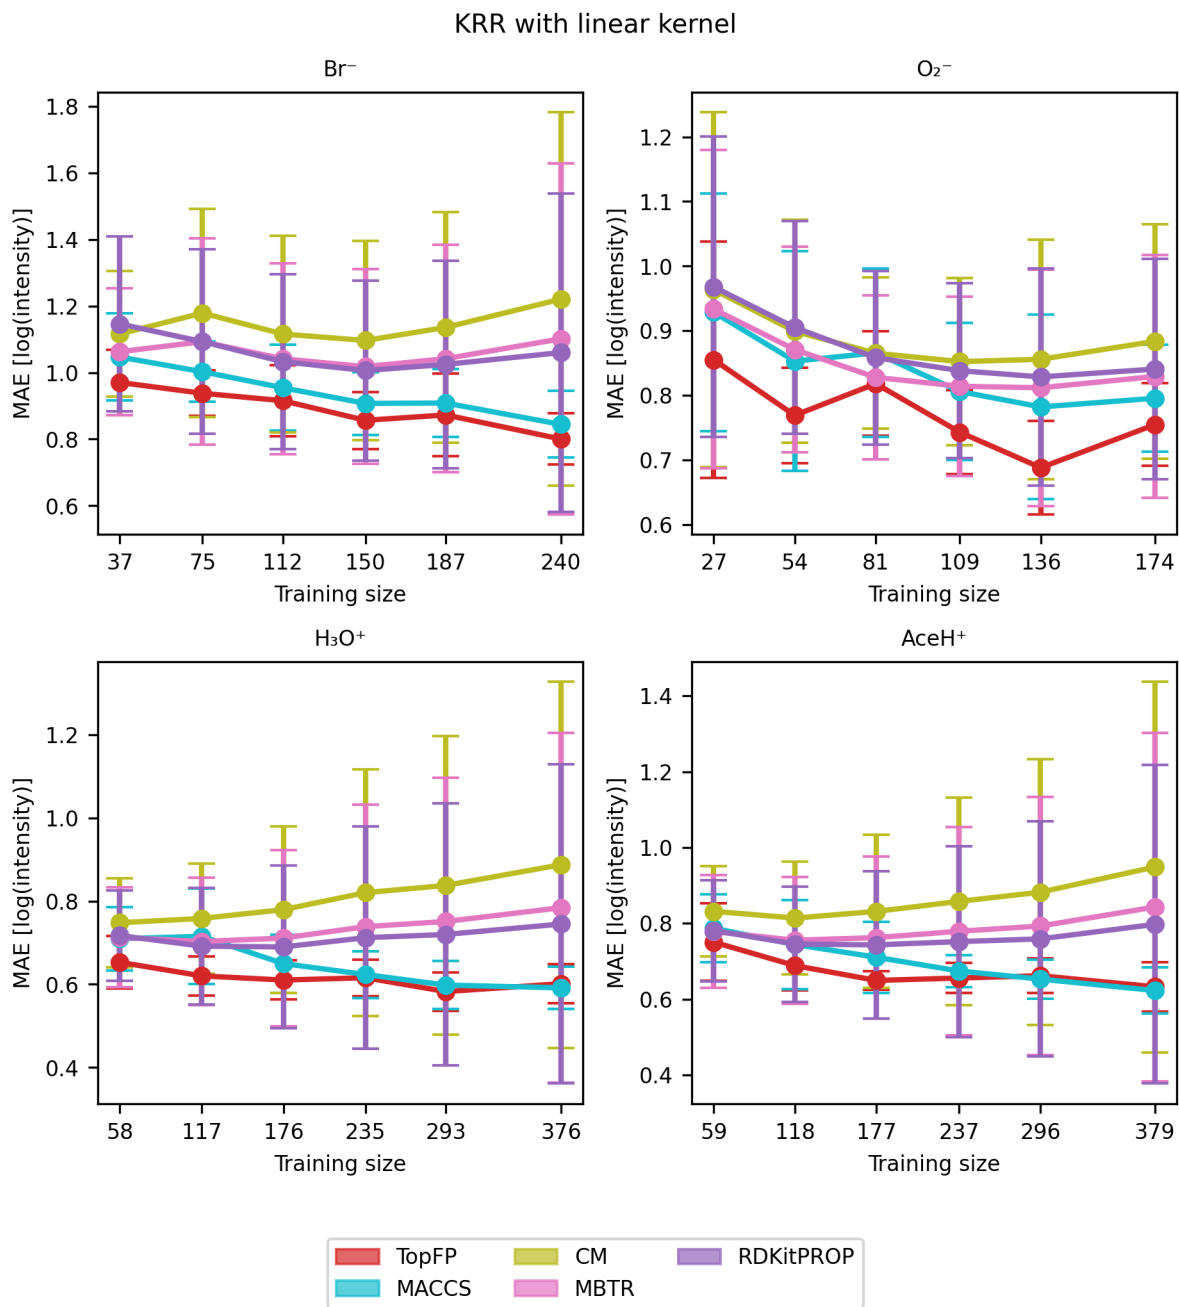

**Figure S21.** Linear KRR learning curve with mean absolute error (MAE) of the signal intensity values in logarithmic scale of  $\text{Br}^-$ ,  $\text{O}_2^-$ ,  $\text{H}_3\text{O}^+$  and  $\text{AceH}^+$  datasets, based on the TopFP, MACCS, CM, MBTR and properties as the descriptors. The x-axis reports the training set size, the y-axis reports the MAE of the logarithmic signal intensity. The mean value and standard deviation are obtained by repeating the training with five different random re-shuffling of the dataset.

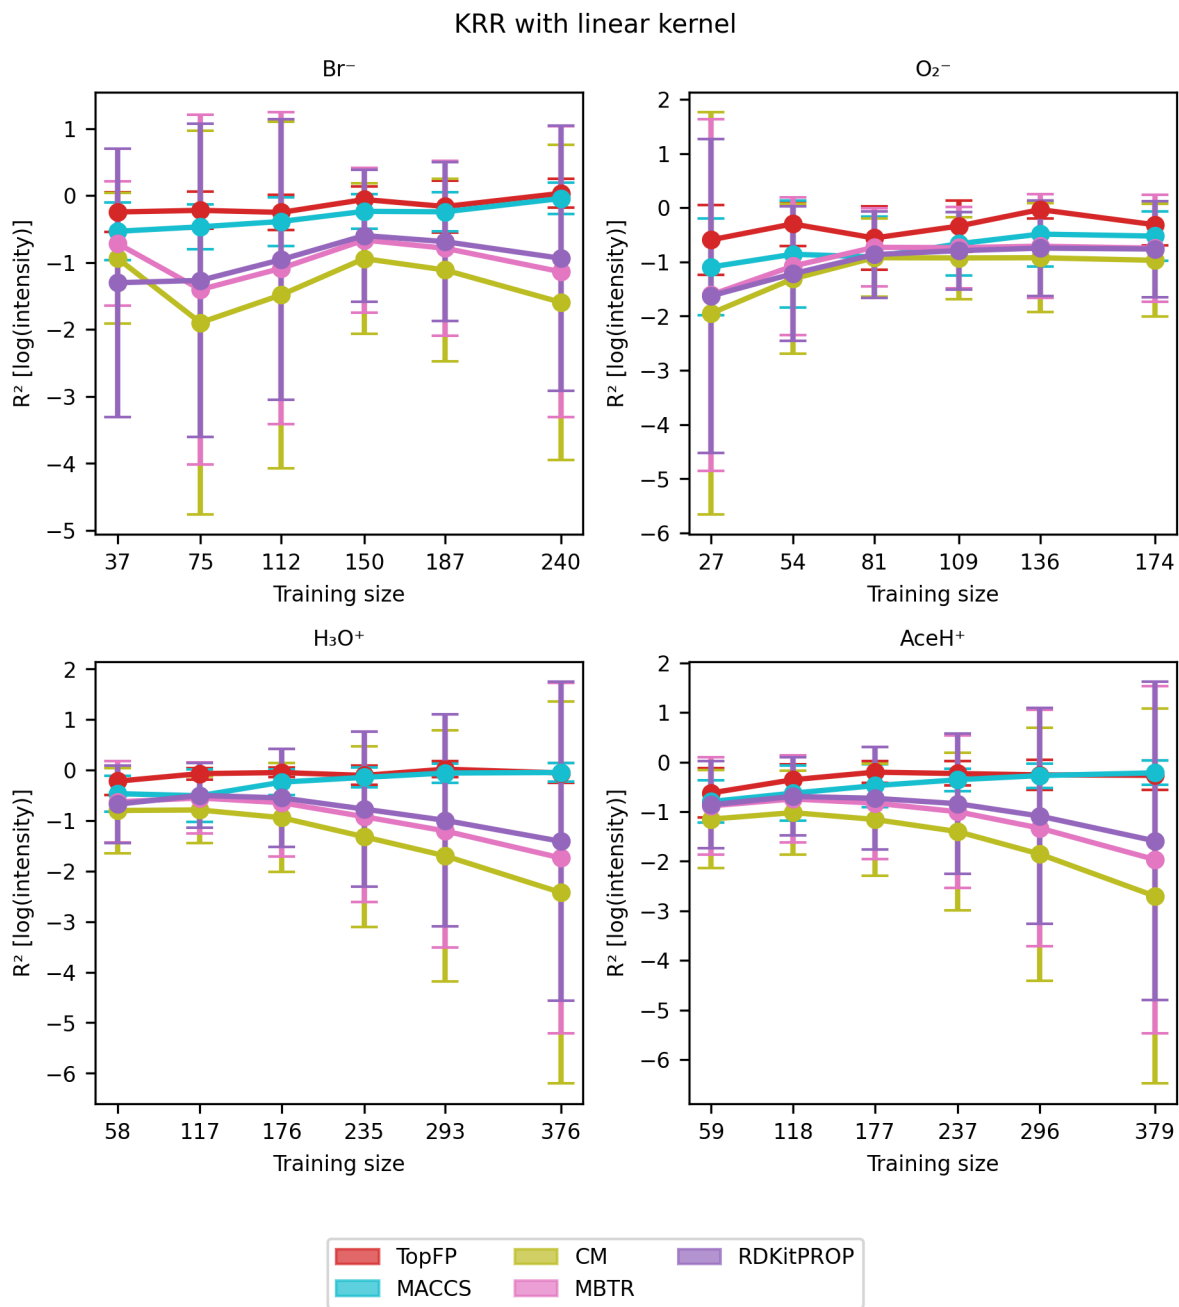

**Figure S22.** Linear KRR learning curve with correlation coefficient ( $R^2$ ) of the signal intensity values in logarithmic scale of  $\text{Br}^-$ ,  $\text{O}_2^-$ ,  $\text{H}_3\text{O}^+$  and  $\text{AceH}^+$  datasets, based on the TopFP, MACCS, CM, MBTR and properties as the descriptors. The x-axis reports the training set size, the y-axis reports the  $R^2$  of the logarithmic signal intensity. The mean value and standard deviation are obtained by repeating the training with five different random re-shuffling of the dataset.

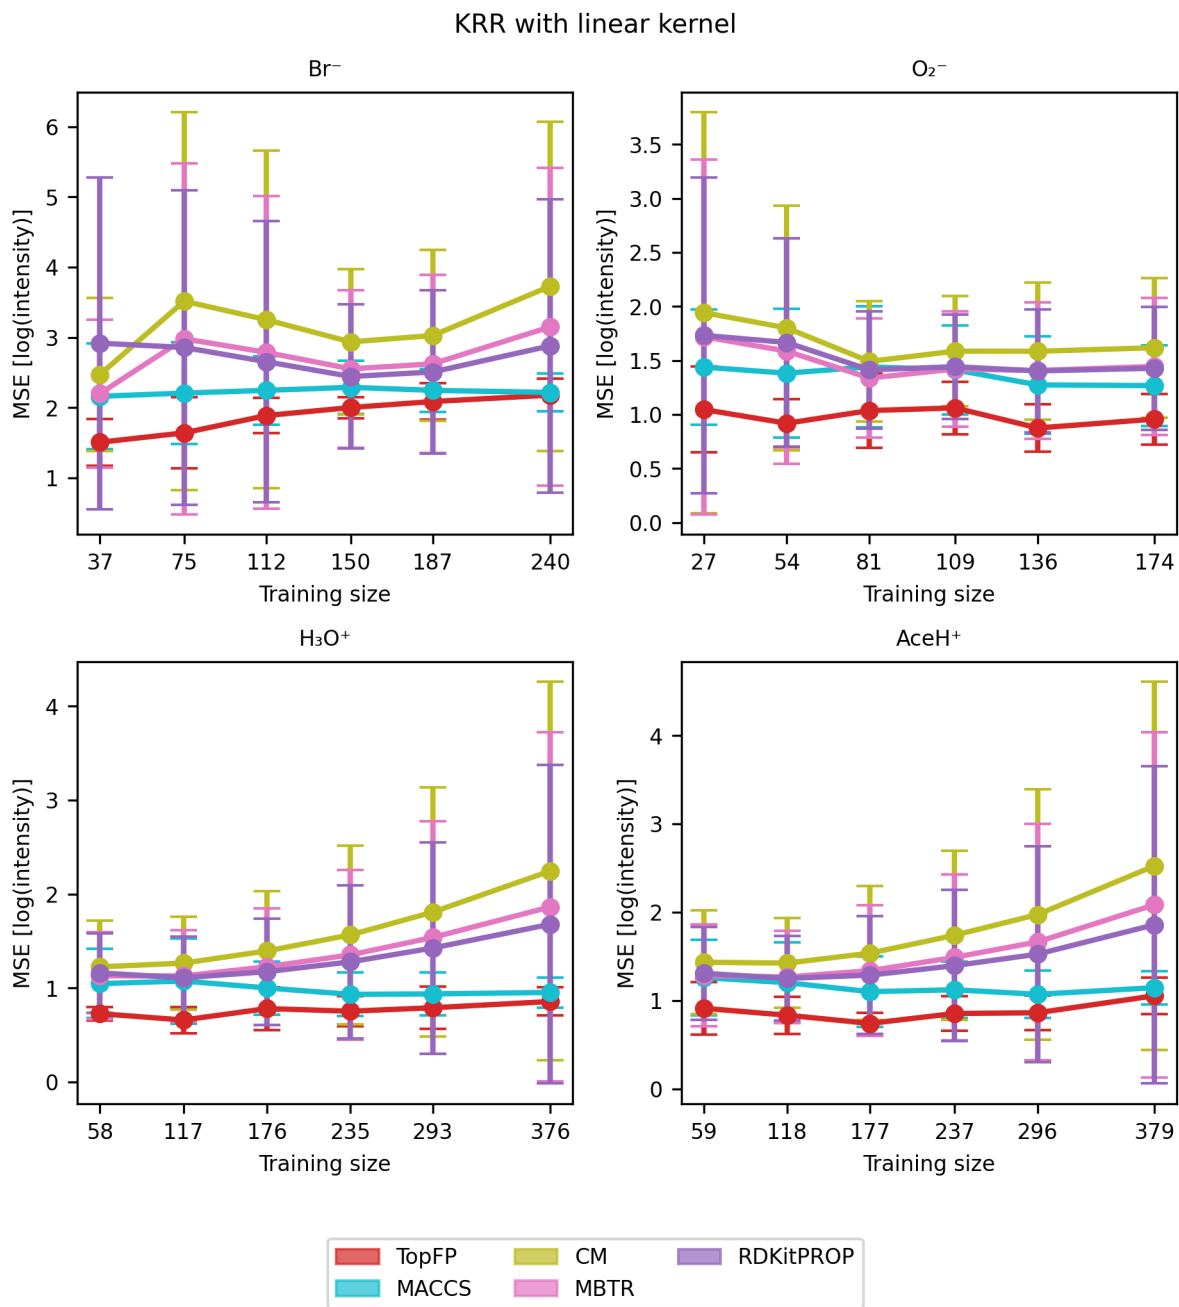

**Figure S23.** Linear KRR learning curve with mean squared error (MSE) of the signal intensity values in logarithmic scale of  $\text{Br}^-$ ,  $\text{O}_2^-$ ,  $\text{H}_3\text{O}^+$  and  $\text{AceH}^+$  datasets, based on the TopFP, MACCS, CM, MBTR and properties as the descriptors. The x-axis reports the training set size, the y-axis reports the MSE of the logarithmic signal intensity. The mean value and standard deviation are obtained by repeating the training with five different random re-shuffling of the dataset.

**Table S30.** Hyperparameters tuned for RF regressor model with PROP as the molecular descriptor.

| Reagent ion                   | Training size | Random seed | Hyperparameters |           |                  |                   |
|-------------------------------|---------------|-------------|-----------------|-----------|------------------|-------------------|
|                               |               |             | RF regressor    |           |                  |                   |
|                               |               |             | N estimators    | Max depth | Min samples leaf | Min samples split |
| Br <sup>-</sup>               | 240           | 555         | 2000            | 60        | 2                | 5                 |
|                               |               | 8           | 1500            | None      | 1                | 5                 |
|                               |               | 52          | 1000            | 100       | 1                | 5                 |
|                               |               | 1066        | 500             | 60        | 1                | 2                 |
|                               |               | 324         | 2000            | None      | 1                | 5                 |
| O <sub>2</sub> <sup>-</sup>   | 174           | 555         | 1000            | 40        | 1                | 2                 |
|                               |               | 8           | 1500            | 100       | 1                | 2                 |
|                               |               | 52          | 1500            | 20        | 1                | 2                 |
|                               |               | 1066        | 100             | 40        | 4                | 5                 |
|                               |               | 324         | 500             | 40        | 2                | 2                 |
| H <sub>3</sub> O <sup>+</sup> | 376           | 555         | 2000            | 60        | 2                | 2                 |
|                               |               | 8           | 1000            | None      | 4                | 5                 |
|                               |               | 52          | 1000            | 60        | 4                | 10                |
|                               |               | 1066        | 100             | 80        | 4                | 2                 |
|                               |               | 324         | 500             | 80        | 2                | 5                 |
| AceH <sup>+</sup>             | 379           | 555         | 500             | 20        | 4                | 5                 |
|                               |               | 8           | 1500            | 40        | 1                | 2                 |
|                               |               | 52          | 2000            | 80        | 4                | 2                 |
|                               |               | 1066        | 1000            | 20        | 2                | 2                 |
|                               |               | 324         | 1500            | 40        | 1                | 2                 |

**Table S31.** Hyperparameters tuned for RF regressor model with TopFP as the molecular descriptor.

| Reagent ion                   | Training size | Random seed | Hyperparameters |          |                 |              |           |                  |                   |
|-------------------------------|---------------|-------------|-----------------|----------|-----------------|--------------|-----------|------------------|-------------------|
|                               |               |             | TopFP           |          |                 | RF regressor |           |                  |                   |
|                               |               |             | Fp size         | Max path | N bits per hash | N estimators | Max depth | Min samples leaf | Min samples split |
| Br <sup>-</sup>               | 240           | 555         | 4096            | 7        | 2               | 100          | 80        | 4                | 5                 |
|                               |               | 8           | 8192            | 7        | 16              | 100          | 40        | 1                | 2                 |
|                               |               | 52          | 8192            | 10       | 2               | 100          | None      | 1                | 2                 |
|                               |               | 1066        | 4096            | 7        | 16              | 1000         | 80        | 1                | 2                 |
|                               |               | 324         | 2048            | 8        | 2               | 2000         | 100       | 2                | 10                |
| O <sub>2</sub> <sup>-</sup>   | 174           | 555         | 4096            | 7        | 4               | 1000         | 20        | 1                | 10                |
|                               |               | 8           | 4096            | 8        | 4               | 500          | 80        | 4                | 10                |
|                               |               | 52          | 8192            | 7        | 2               | 1000         | 40        | 1                | 5                 |
|                               |               | 1066        | 8192            | 7        | 8               | 1500         | 20        | 4                | 5                 |
|                               |               | 324         | 716             | 7        | 2               | 100          | 60        | 4                | 5                 |
| H <sub>3</sub> O <sup>+</sup> | 376           | 555         | 8192            | 8        | 2               | 1500         | 60        | 2                | 2                 |
|                               |               | 8           | 4096            | 7        | 2               | 100          | 20        | 1                | 10                |
|                               |               | 52          | 716             | 7        | 2               | 1000         | None      | 2                | 2                 |
|                               |               | 1066        | 8192            | 9        | 4               | 100          | 60        | 1                | 5                 |
|                               |               | 324         | 4096            | 9        | 4               | 500          | 40        | 2                | 5                 |
| AceH <sup>+</sup>             | 379           | 555         | 8192            | 7        | 2               | 1500         | 60        | 4                | 5                 |
|                               |               | 8           | 4096            | 8        | 4               | 1000         | 80        | 4                | 2                 |
|                               |               | 52          | 4096            | 7        | 4               | 2000         | 80        | 4                | 10                |
|                               |               | 1066        | 8192            | 7        | 4               | 100          | None      | 2                | 10                |
|                               |               | 324         | 8192            | 7        | 4               | 1500         | 40        | 1                | 2                 |

**Table S32.** Hyperparameters tuned for RF regressor model with MACCS as the molecular descriptor.

| Reagent ion                   | Training size | Random seed | Hyperparameters |           |                  |                   |
|-------------------------------|---------------|-------------|-----------------|-----------|------------------|-------------------|
|                               |               |             | RF regressor    |           |                  |                   |
|                               |               |             | N estimators    | Max depth | Min samples leaf | Min samples split |
| Br <sup>-</sup>               | 240           | 555         | 100             | 60        | 1                | 2                 |
|                               |               | 8           | 1500            | None      | 1                | 2                 |
|                               |               | 52          | 1500            | 20        | 1                | 2                 |
|                               |               | 1066        | 500             | None      | 2                | 2                 |
|                               |               | 324         | 500             | 80        | 1                | 5                 |
| O <sub>2</sub> <sup>-</sup>   | 174           | 555         | 1000            | 60        | 1                | 5                 |
|                               |               | 8           | 1500            | 20        | 1                | 2                 |
|                               |               | 52          | 2000            | 20        | 1                | 2                 |
|                               |               | 1066        | 100             | 40        | 1                | 2                 |
|                               |               | 324         | 100             | None      | 1                | 2                 |
| H <sub>3</sub> O <sup>+</sup> | 376           | 555         | 2000            | 20        | 1                | 2                 |
|                               |               | 8           | 500             | 100       | 1                | 2                 |
|                               |               | 52          | 500             | None      | 1                | 2                 |
|                               |               | 1066        | 1500            | 80        | 2                | 5                 |
|                               |               | 324         | 1000            | 40        | 2                | 2                 |
| AceH <sup>+</sup>             | 379           | 555         | 2000            | None      | 1                | 2                 |
|                               |               | 8           | 100             | 40        | 1                | 2                 |
|                               |               | 52          | 2000            | 20        | 1                | 2                 |
|                               |               | 1066        | 500             | 60        | 2                | 2                 |
|                               |               | 324         | 1000            | 80        | 1                | 2                 |

**Table S33.** Hyperparameters tuned for RF regressor model with CM as the molecular descriptor.

| Reagent ion                   | Training size | Random seed | Hyperparameters |           |                  |                   |
|-------------------------------|---------------|-------------|-----------------|-----------|------------------|-------------------|
|                               |               |             | RF regressor    |           |                  |                   |
|                               |               |             | N estimators    | Max depth | Min samples leaf | Min samples split |
| Br <sup>-</sup>               | 240           | 555         | 1500            | 20        | 2                | 2                 |
|                               |               | 8           | 1500            | None      | 1                | 2                 |
|                               |               | 52          | 2000            | 40        | 1                | 5                 |
|                               |               | 1066        | 100             | None      | 2                | 2                 |
|                               |               | 324         | 100             | 80        | 1                | 10                |
| O <sub>2</sub> <sup>-</sup>   | 174           | 555         | 1500            | 60        | 1                | 2                 |
|                               |               | 8           | 500             | 40        | 1                | 10                |
|                               |               | 52          | 100             | None      | 4                | 10                |
|                               |               | 1066        | 500             | 100       | 1                | 2                 |
|                               |               | 324         | 500             | None      | 1                | 5                 |
| H <sub>3</sub> O <sup>+</sup> | 376           | 555         | 100             | 80        | 2                | 5                 |
|                               |               | 8           | 100             | 20        | 4                | 5                 |
|                               |               | 52          | 1000            | 80        | 1                | 5                 |
|                               |               | 1066        | 100             | 60        | 1                | 5                 |
|                               |               | 324         | 1000            | None      | 4                | 10                |
| AceH <sup>+</sup>             | 379           | 555         | 1500            | 80        | 4                | 2                 |
|                               |               | 8           | 100             | 60        | 2                | 5                 |
|                               |               | 52          | 1000            | 80        | 1                | 2                 |
|                               |               | 1066        | 2000            | 40        | 2                | 2                 |
|                               |               | 324         | 500             | 40        | 4                | 2                 |

**Table S34.** Hyperparameters tuned for RF regressor model with MBTR as the molecular descriptor.

| Reagent ion                   | Training size | Random seed | Hyperparameters |       |            |       |              |           |                  |                   |
|-------------------------------|---------------|-------------|-----------------|-------|------------|-------|--------------|-----------|------------------|-------------------|
|                               |               |             | MBTR            |       |            |       | RF regressor |           |                  |                   |
|                               |               |             | $\sigma_2$      | $w_2$ | $\sigma_3$ | $w_3$ | N estimators | Max depth | Min samples leaf | Min samples split |
| Br <sup>-</sup>               | 240           | 555         | 0.1             | 0.4   | 0.1        | 0.8   | 500          | None      | 1                | 5                 |
|                               |               | 8           | 0.1             | 0.4   | 0.3        | 1.2   | 1000         | 20        | 4                | 5                 |
|                               |               | 52          | 0.3             | 0.2   | 0.1        | 0.8   | 500          | 100       | 2                | 5                 |
|                               |               | 1066        | 0.01            | 0.8   | 0.01       | 1.2   | 1000         | 40        | 4                | 2                 |
|                               |               | 324         | 0.01            | 0.2   | 0.1        | 1.2   | 100          | 20        | 1                | 2                 |
| O <sub>2</sub> <sup>-</sup>   | 174           | 555         | 0.01            | 0.8   | 0.3        | 0.4   | 500          | None      | 4                | 2                 |
|                               |               | 8           | 0.1             | 0.4   | 0.3        | 0.4   | 1500         | 80        | 2                | 5                 |
|                               |               | 52          | 0.01            | 0.4   | 0.1        | 1.4   | 500          | 40        | 1                | 2                 |
|                               |               | 1066        | 0.1             | 0.2   | 0.1        | 0.8   | 100          | 100       | 2                | 5                 |
|                               |               | 324         | 0.1             | 0.2   | 0.01       | 0.8   | 1000         | 40        | 2                | 10                |
| H <sub>3</sub> O <sup>+</sup> | 376           | 555         | 0.1             | 1.4   | 0.3        | 1.2   | 2000         | 80        | 1                | 5                 |
|                               |               | 8           | 0.001           | 0.8   | 0.001      | 1.2   | 1000         | 40        | 1                | 2                 |
|                               |               | 52          | 0.01            | 1.4   | 0.1        | 0.4   | 500          | 80        | 4                | 2                 |
|                               |               | 1066        | 0.1             | 1.2   | 0.3        | 0.2   | 2000         | 40        | 1                | 5                 |
|                               |               | 324         | 0.01            | 0.8   | 0.1        | 0.8   | 100          | None      | 2                | 10                |
| AceH <sup>+</sup>             | 379           | 555         | 0.01            | 1.2   | 0.3        | 1.4   | 2000         | 80        | 2                | 2                 |
|                               |               | 8           | 0.1             | 0.4   | 0.1        | 0.2   | 1500         | None      | 1                | 10                |
|                               |               | 52          | 0.3             | 0.2   | 0.3        | 1.2   | 500          | 40        | 1                | 2                 |
|                               |               | 1066        | 0.1             | 0.2   | 0.1        | 0.4   | 2000         | 60        | 2                | 5                 |
|                               |               | 324         | 0.01            | 0.8   | 0.1        | 1.2   | 100          | 80        | 1                | 5                 |

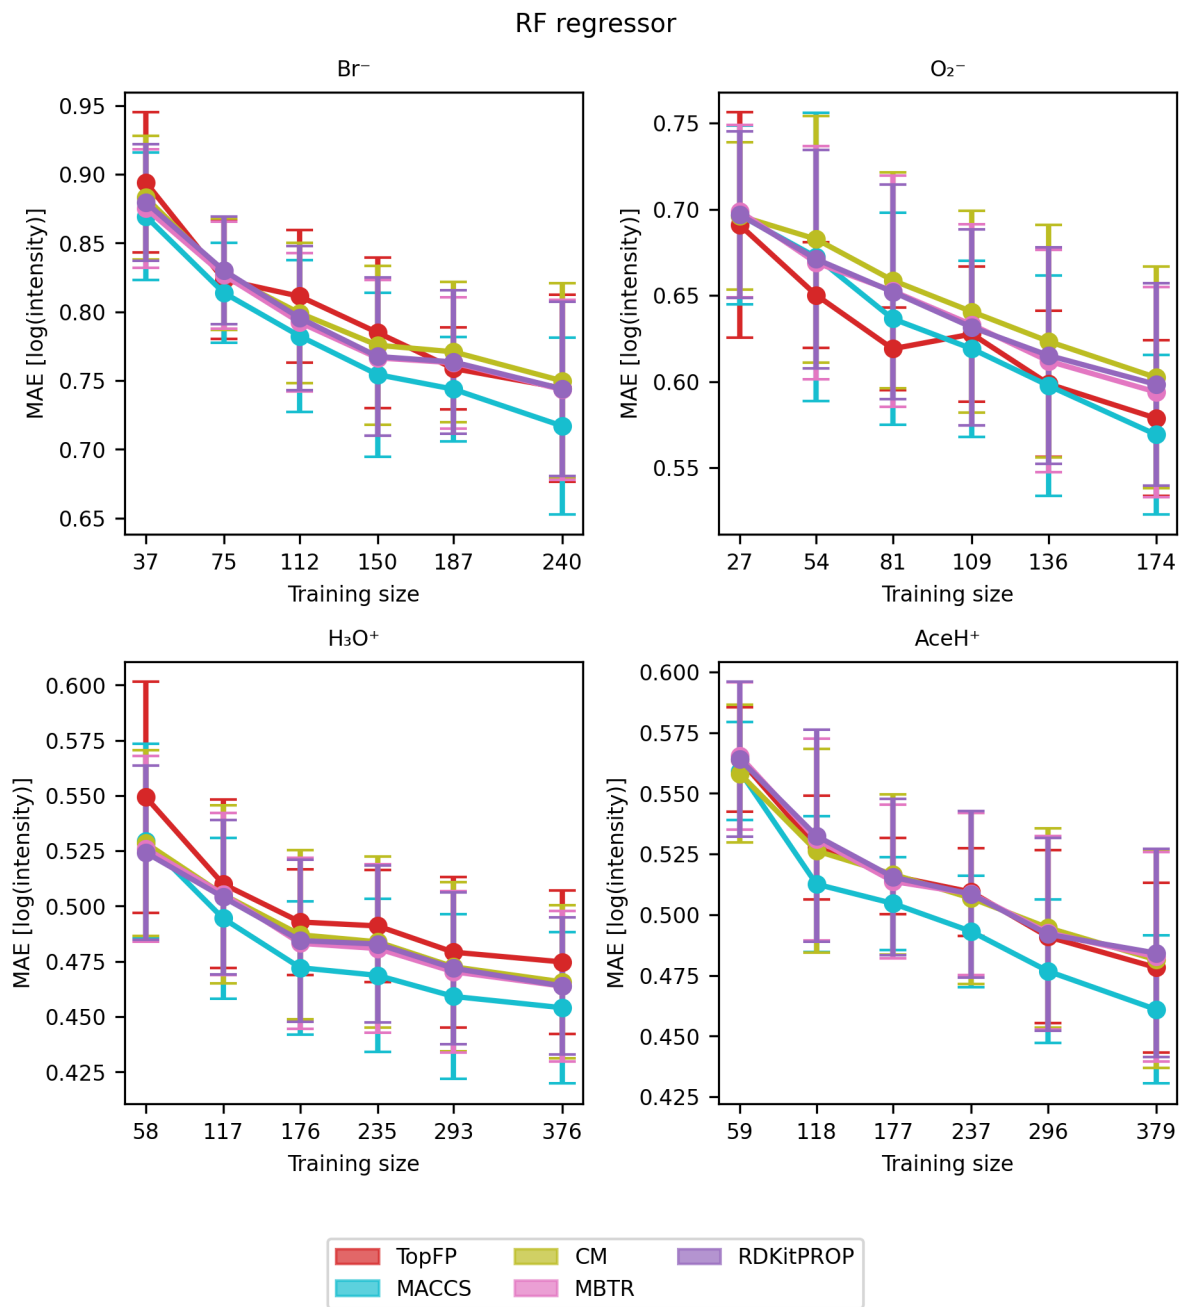

**Figure S24.** RF regressor learning curve with mean absolute error (MAE) of the signal intensity values in logarithmic scale of  $\text{Br}^-$ ,  $\text{O}_2^-$ ,  $\text{H}_3\text{O}^+$  and  $\text{AceH}^+$  datasets, based on the TopFP, MACCS, CM, MBTR and properties as the descriptors. The x-axis reports the training set size, the y-axis reports the MAE of the logarithmic signal intensity. The mean value and standard deviation are obtained by repeating the training with five different random re-shuffling of the dataset.

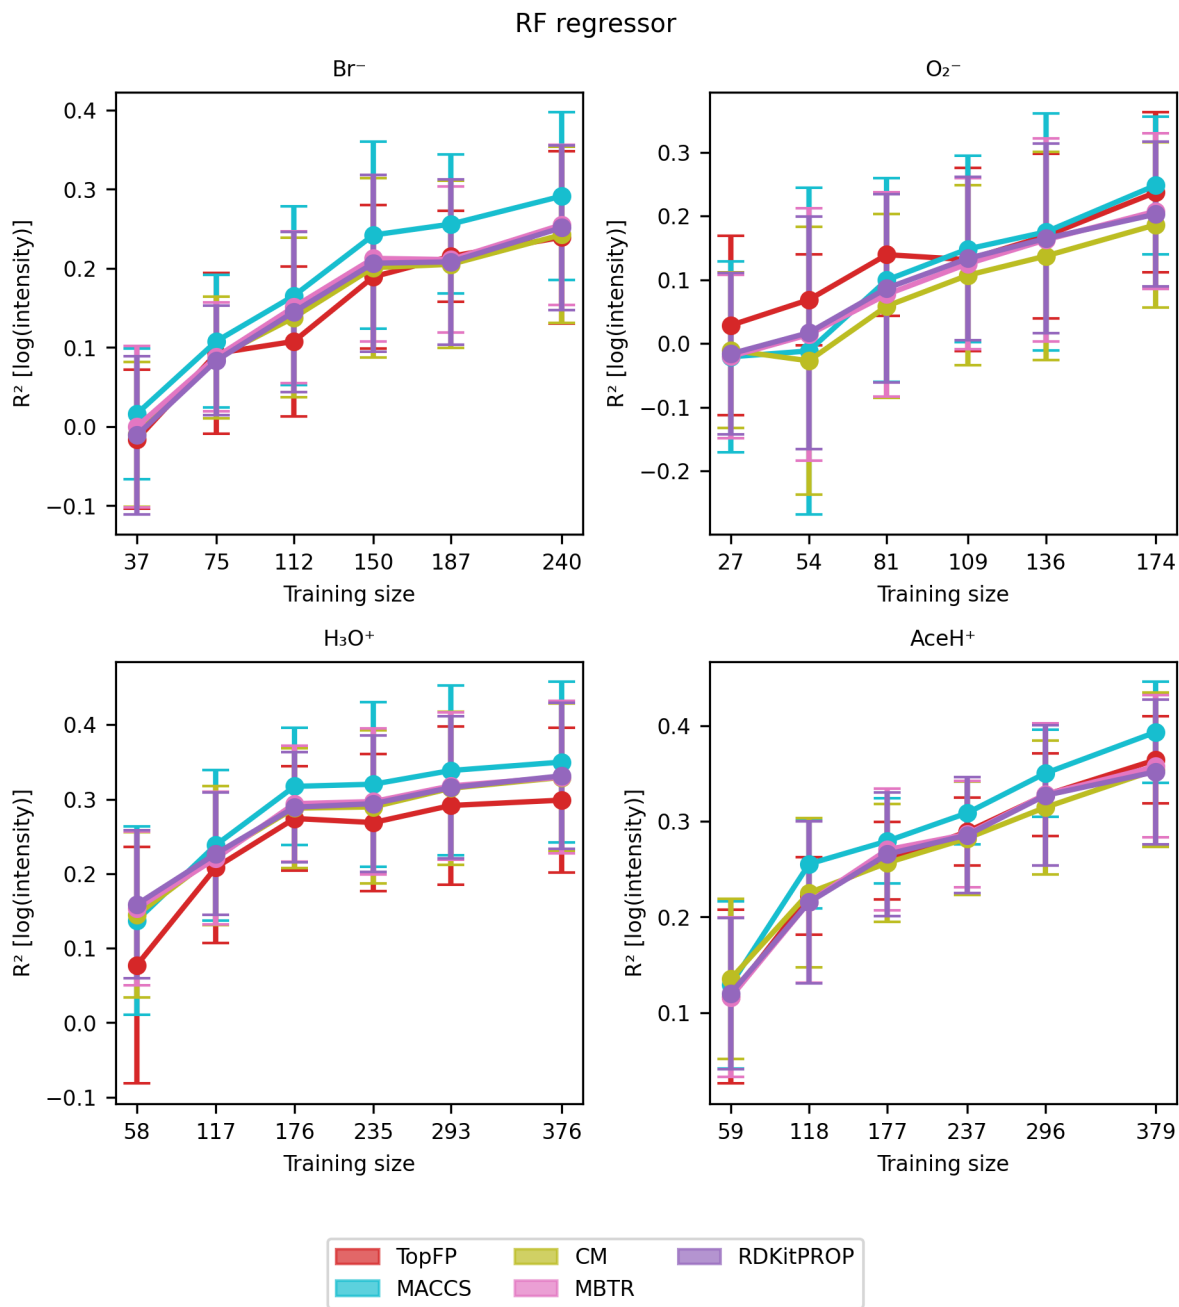

**Figure S25.** RF regressor learning curve with correlation coefficient ( $R^2$ ) of the signal intensity values in logarithmic scale of  $\text{Br}^-$ ,  $\text{O}_2^-$ ,  $\text{H}_3\text{O}^+$  and  $\text{AceH}^+$  datasets, based on the TopFP, MACCS, CM, MBTR and properties as the descriptors. The x-axis reports the training set size, the y-axis reports the  $R^2$  of the logarithmic signal intensity. The mean value and standard deviation are obtained by repeating the training with five different random re-shuffling of the dataset.

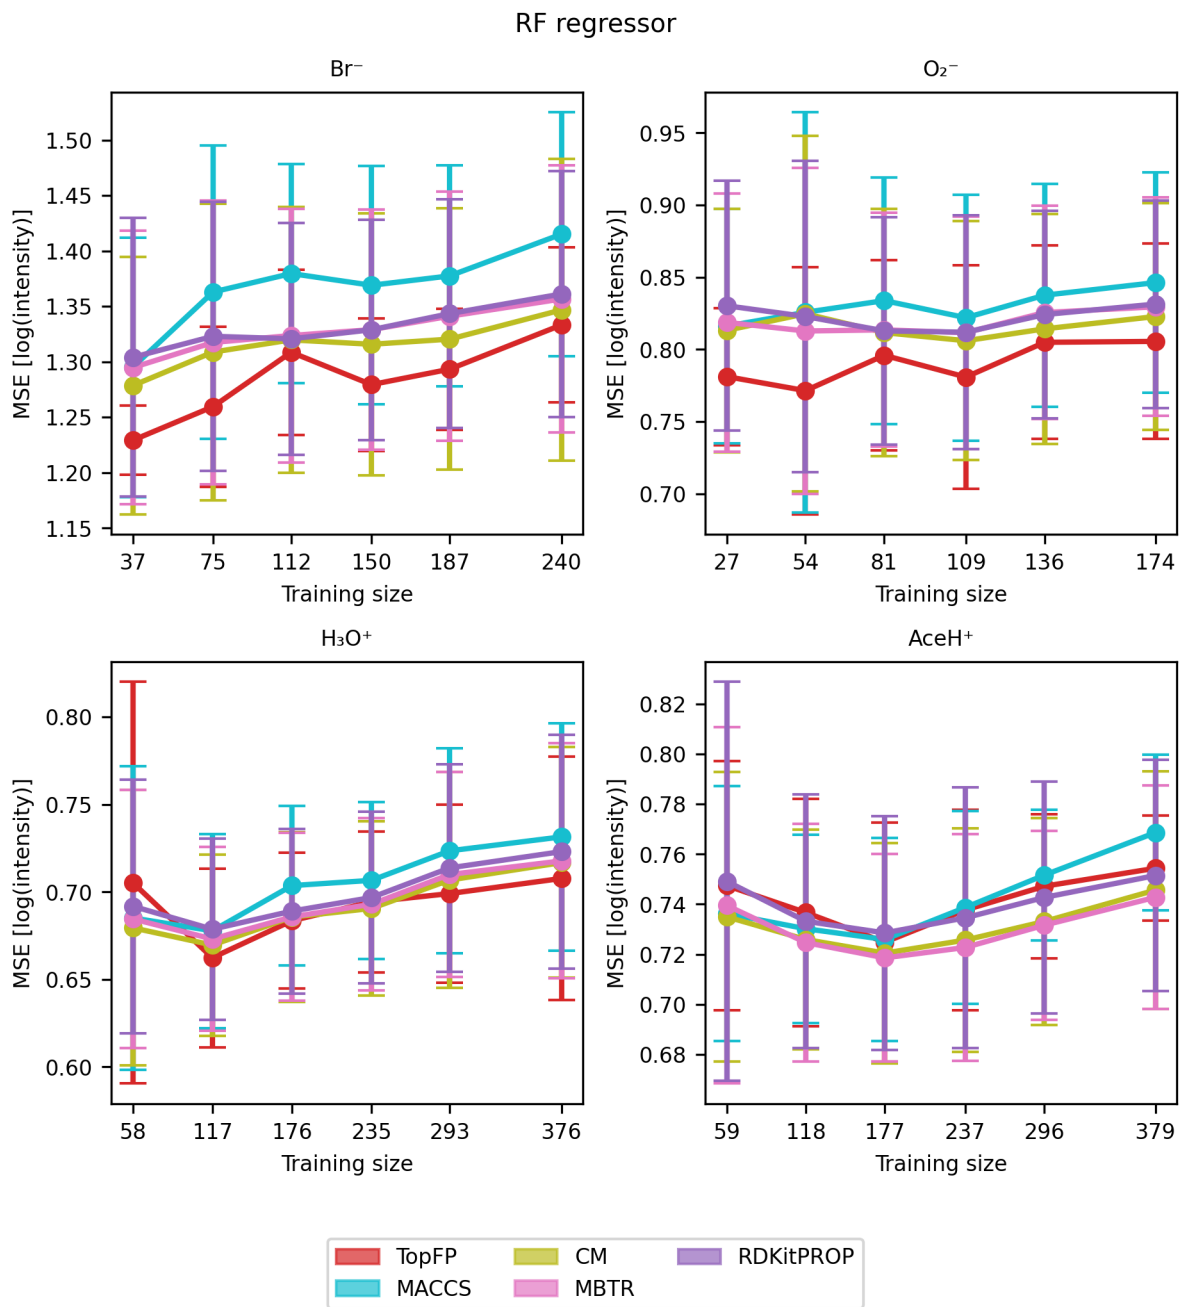

**Figure S26.** RF regressor learning curve with mean squared error (MSE) of the signal intensity values in logarithmic scale of  $\text{Br}^-$ ,  $\text{O}_2^-$ ,  $\text{H}_3\text{O}^+$  and  $\text{AceH}^+$  datasets, based on the TopFP, MACCS, CM, MBTR and properties as the descriptors. The x-axis reports the training set size, the y-axis reports the MSE of the logarithmic signal intensity. The mean value and standard deviation are obtained by repeating the training with five different random re-shuffling of the dataset.

## References

- 75 Ertl, P., Rohde, B., and Selzer, P.: Fast Calculation of Molecular Polar Surface Area as a Sum of Fragment-Based Contributions and Its Application to the Prediction of Drug Transport Properties, *Journal of Medicinal Chemistry*, 43, 3714–3717, <https://doi.org/10.1021/jm000942e>, 2000.
- Hall, L. H. and Kier, L. B.: *The Molecular Connectivity Chi Indexes and Kappa Shape Indexes in Structure-Property Modeling*, chap. 9, pp. 367–422, Wiley-VCH, Inc., New York, 1991.
- 80 Kier, L. B.: An Index of Molecular Flexibility from Kappa Shape Attributes, *Quantitative Structure-Activity Relationships*, 8, 218–221, <https://doi.org/10.1002/qsar.19890080307>, 1989.
- Labute, P.: A Widely Applicable Set of Descriptors, *Journal of Molecular Graphics and Modelling*, 18, 464–477, [https://doi.org/10.1016/S1093-3263\(00\)00068-1](https://doi.org/10.1016/S1093-3263(00)00068-1), 2000.
- Landrum, G.: RDKit: Open-Source Cheminformatics Software, <http://www.rdkit.org>, accessed: 2024-06-04, 2006.
- 85 Partovi, F., Bortolussi, F., Mikkilä, J., and Rissanen, M.: Organic pesticide database with 716 molecules analyzed with chemical ionization mass spectrometry. Reagent ions: bromide, protonated acetone, hydronium ion, dioxide., <https://doi.org/10.5281/zenodo.11208543>, 2024.
- Ruggeri, G. and Takahama, S.: Technical Note: Development of chemoinformatic tools to enumerate functional groups in molecules for organic aerosol characterization, *Atmospheric Chemistry and Physics*, 16, 4401–4422, <https://doi.org/10.5194/acp-16-4401-2016>, 2016.
- Wildman, S. A. and Crippen, G. M.: Prediction of Physicochemical Parameters by Atomic Contributions, *Journal of Chemical Information and Computer Sciences*, 39, 868–873, <https://doi.org/10.1021/ci990307l>, 1999.
- 90
